# Supplementary material for: Wide Range of the Prevalence and Viral Loads of Porcine Circovirus Type 3 (PCV3) in Different Clinical Materials from 21 Polish Pig Farms
Source: MDPI journal article supplement (doi:10.3390/pathogens9050411), 2020-05-25
Supplement: s1 [file s1]

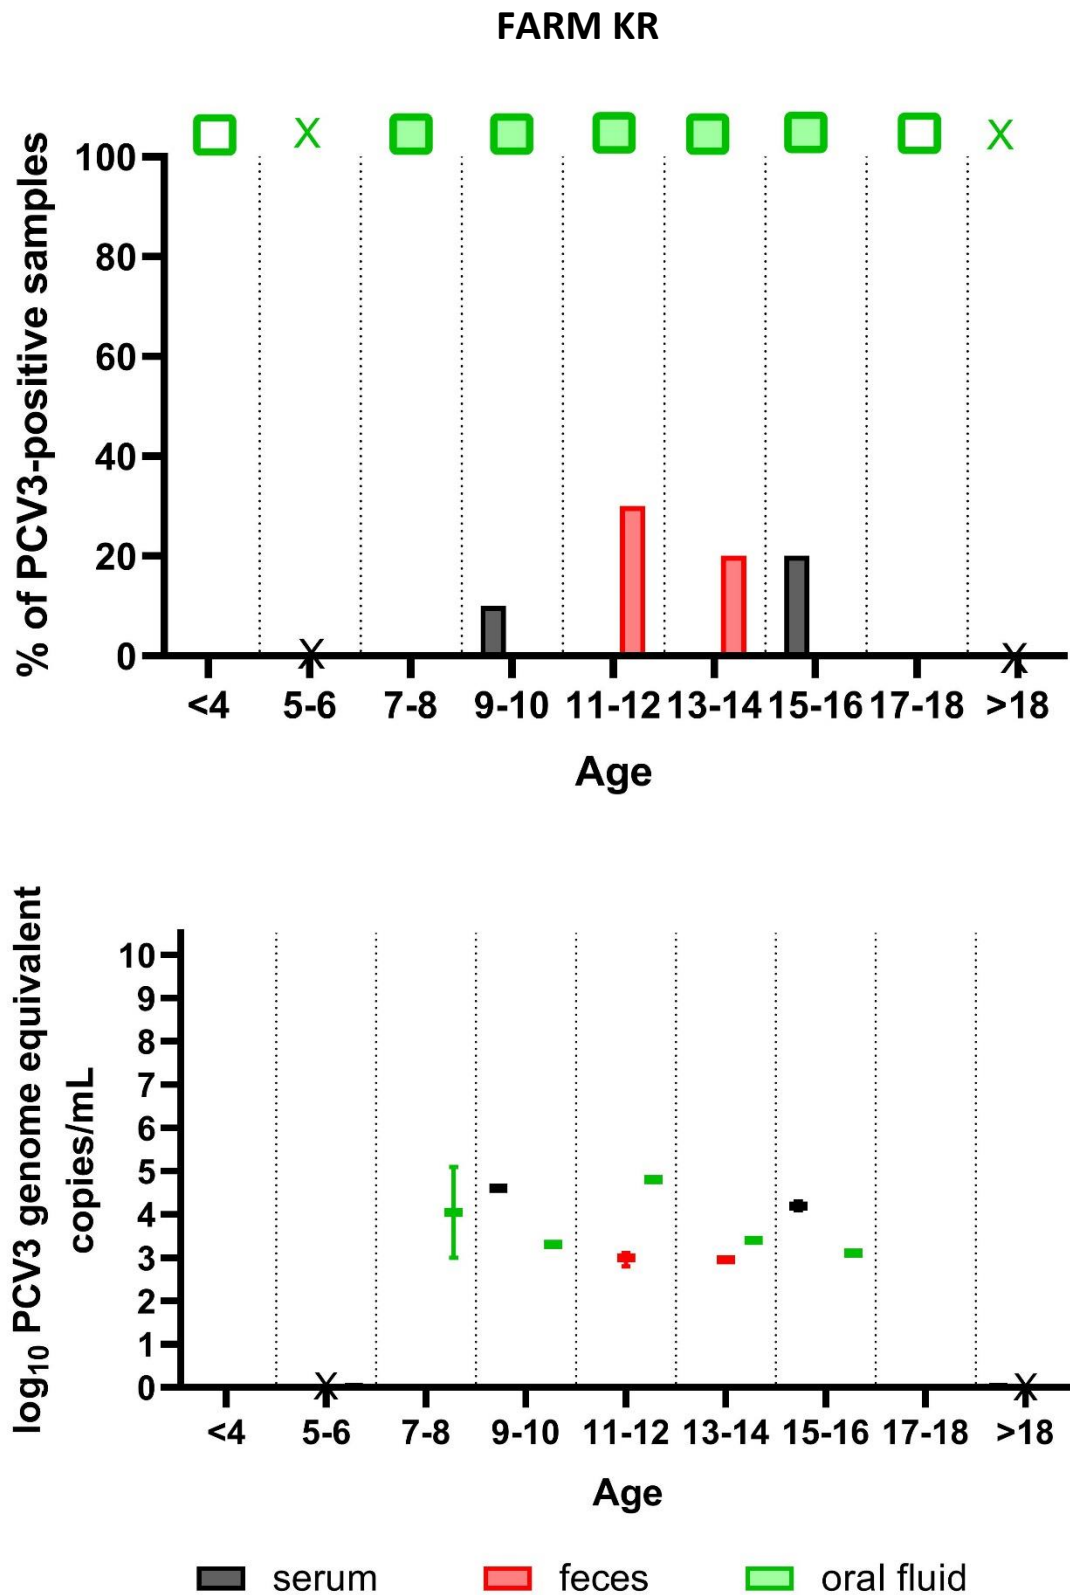

**Figure S1:** Percentages of porcine circovirus type 3 (PCV3)-positive samples and PCV3 viral loads ( $\log_{10}$  genome equivalent copies/mL) in different age groups in examined farms. Age groups with at least one oral fluid PCV3-positive are marked with a solid green square. An empty green square indicates that oral fluids reacted negative for PCV3. The whisker plot shows minimum and maximum. "X" on axis X indicates age group, which was not sampled. A green mark "X" indicates a group, where oral fluid was not obtained. Age is expressed in weeks.

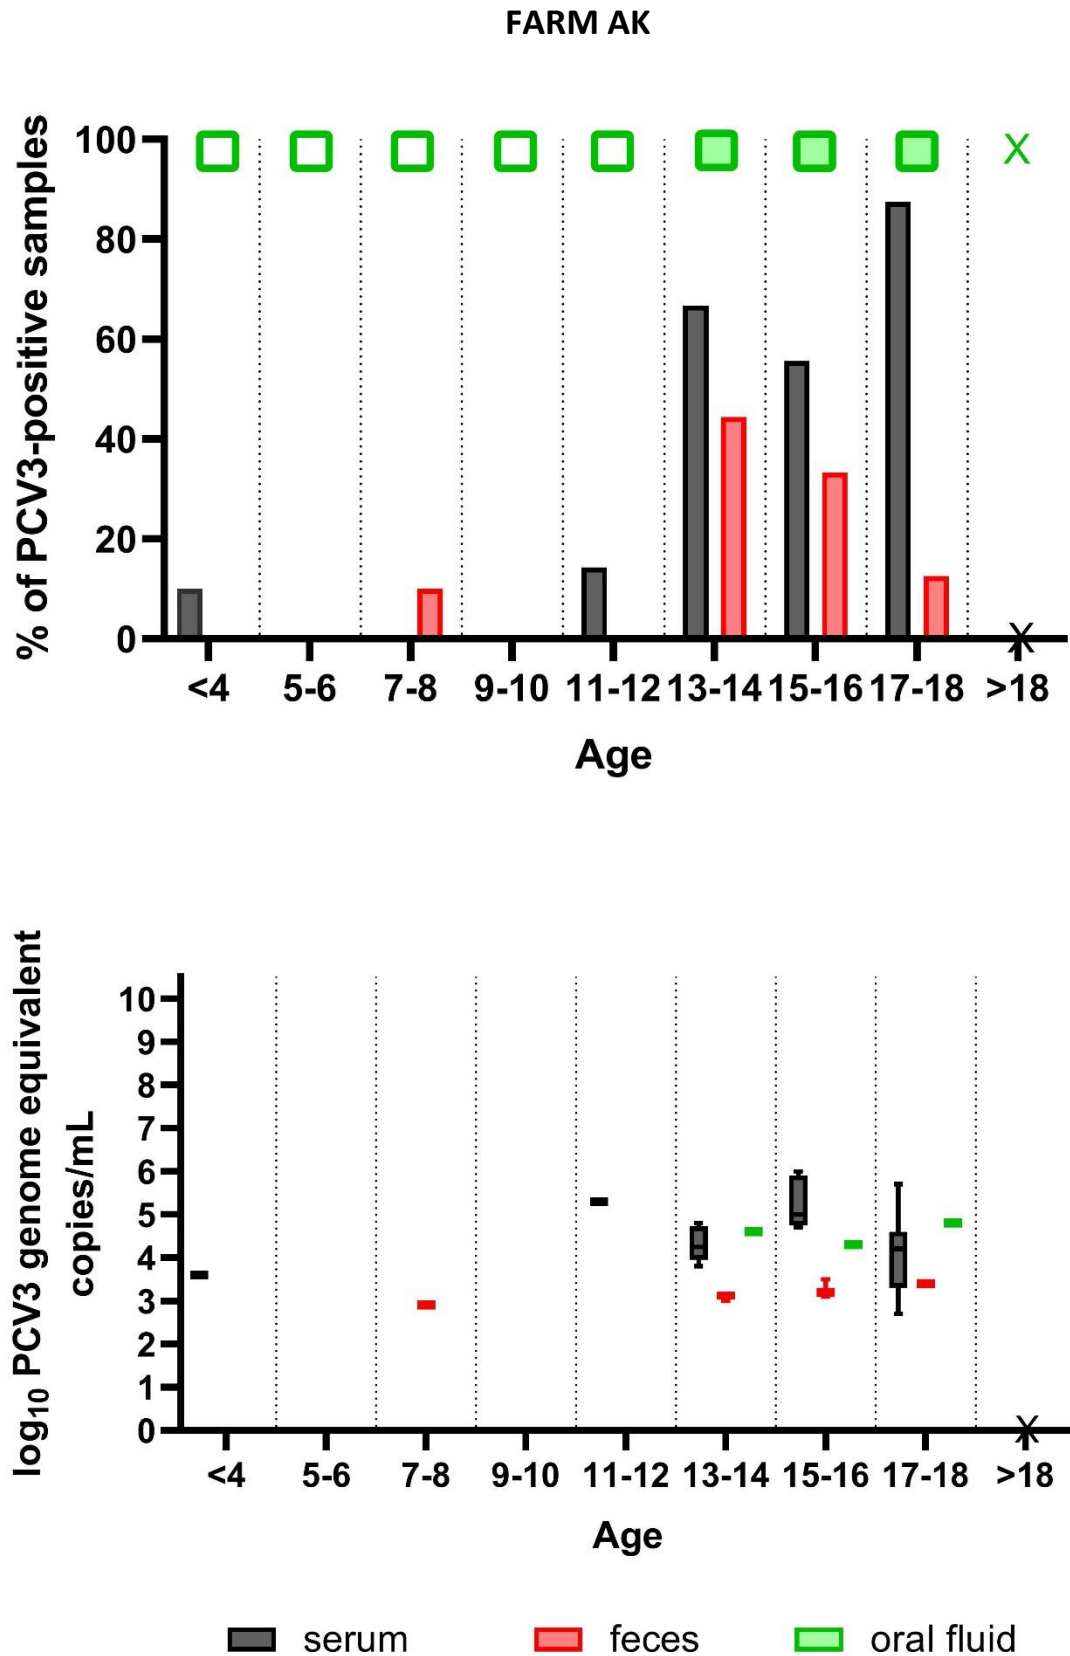

**Figure S1:** Percentages of porcine circovirus type 3 (PCV3)-positive samples and PCV3 viral loads ( $\log_{10}$  genome equivalent copies/mL) in different age groups in examined farms. Age groups with at least one oral fluid PCV3-positive are marked with a solid green square. An empty green square indicates that oral fluids reacted negative for PCV3. The whisker plot shows minimum and maximum. "X" on axis X indicates age group, which was not sampled. A green mark "X" indicates a group, where oral fluid was not obtained. Age is expressed in weeks.

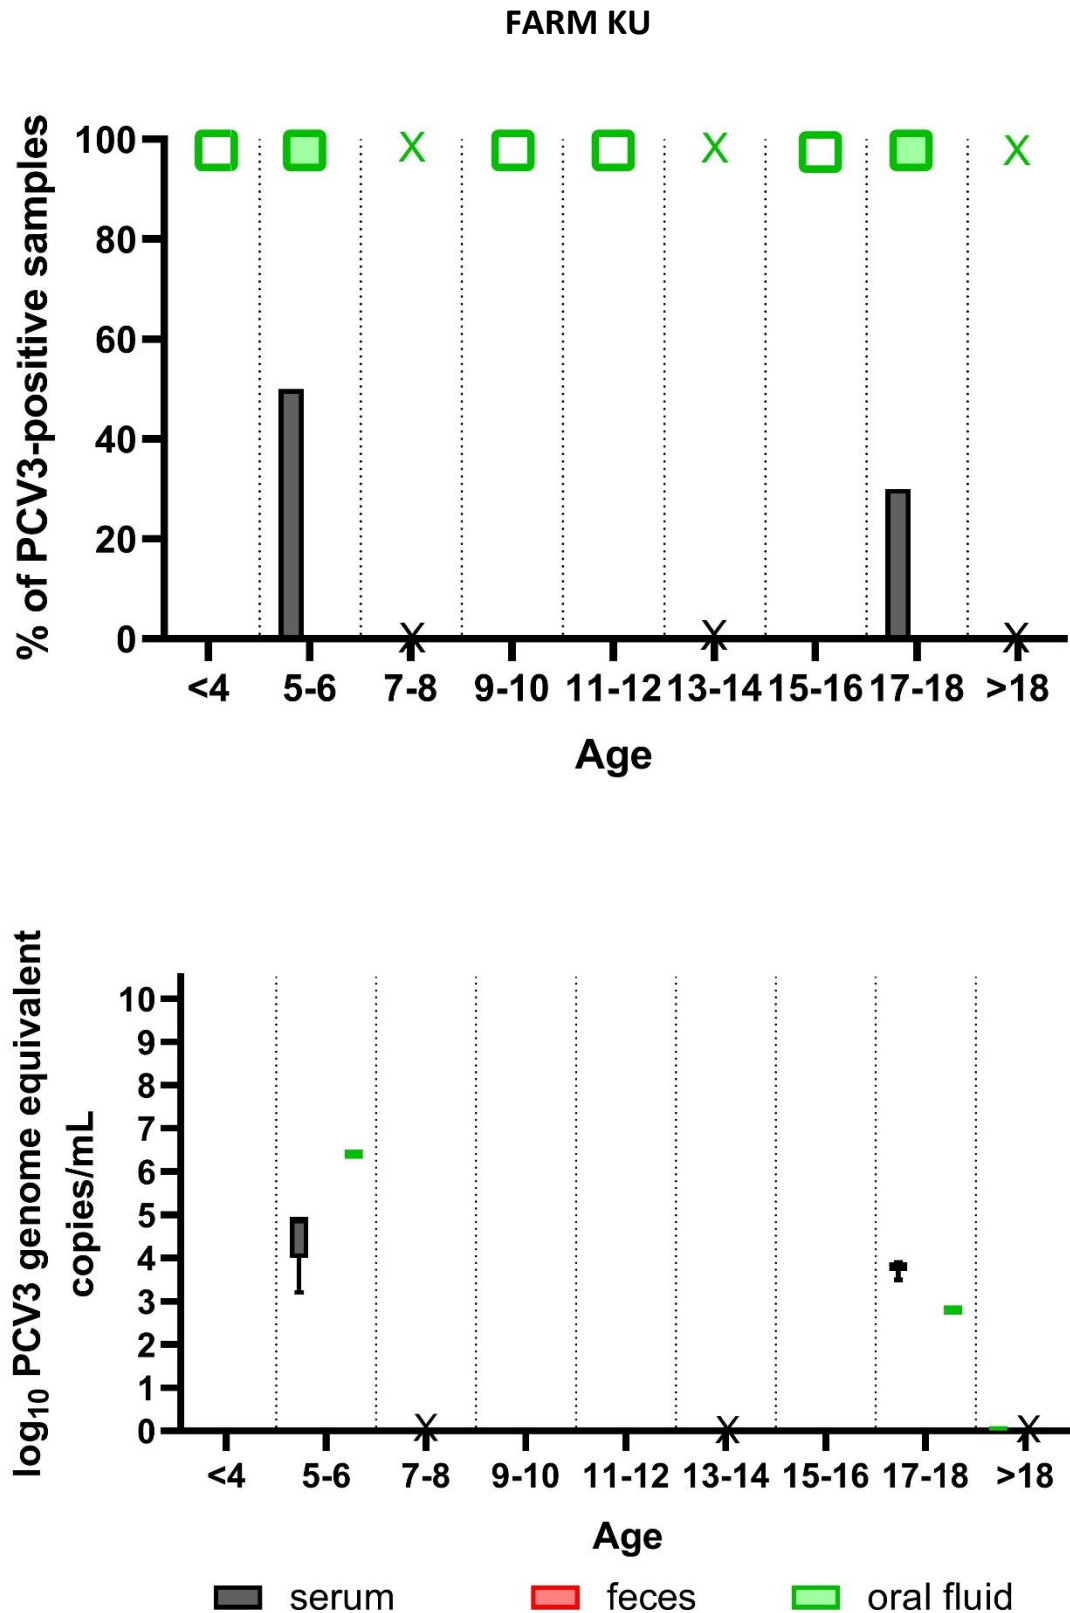

**Figure S1:** Percentages of porcine circovirus type 3 (PCV3)-positive samples and PCV3 viral loads ( $\log_{10}$  genome equivalent copies/mL) in different age groups in examined farms. Age groups with at least one oral fluid PCV3-positive are marked with a solid green square. An empty green square indicates that oral fluids reacted negative for PCV3. The whisker plot shows minimum and maximum. "X" on axis X indicates age group, which was not sampled. A green mark "X" indicates a group, where oral fluid was not obtained. Age is expressed in weeks.

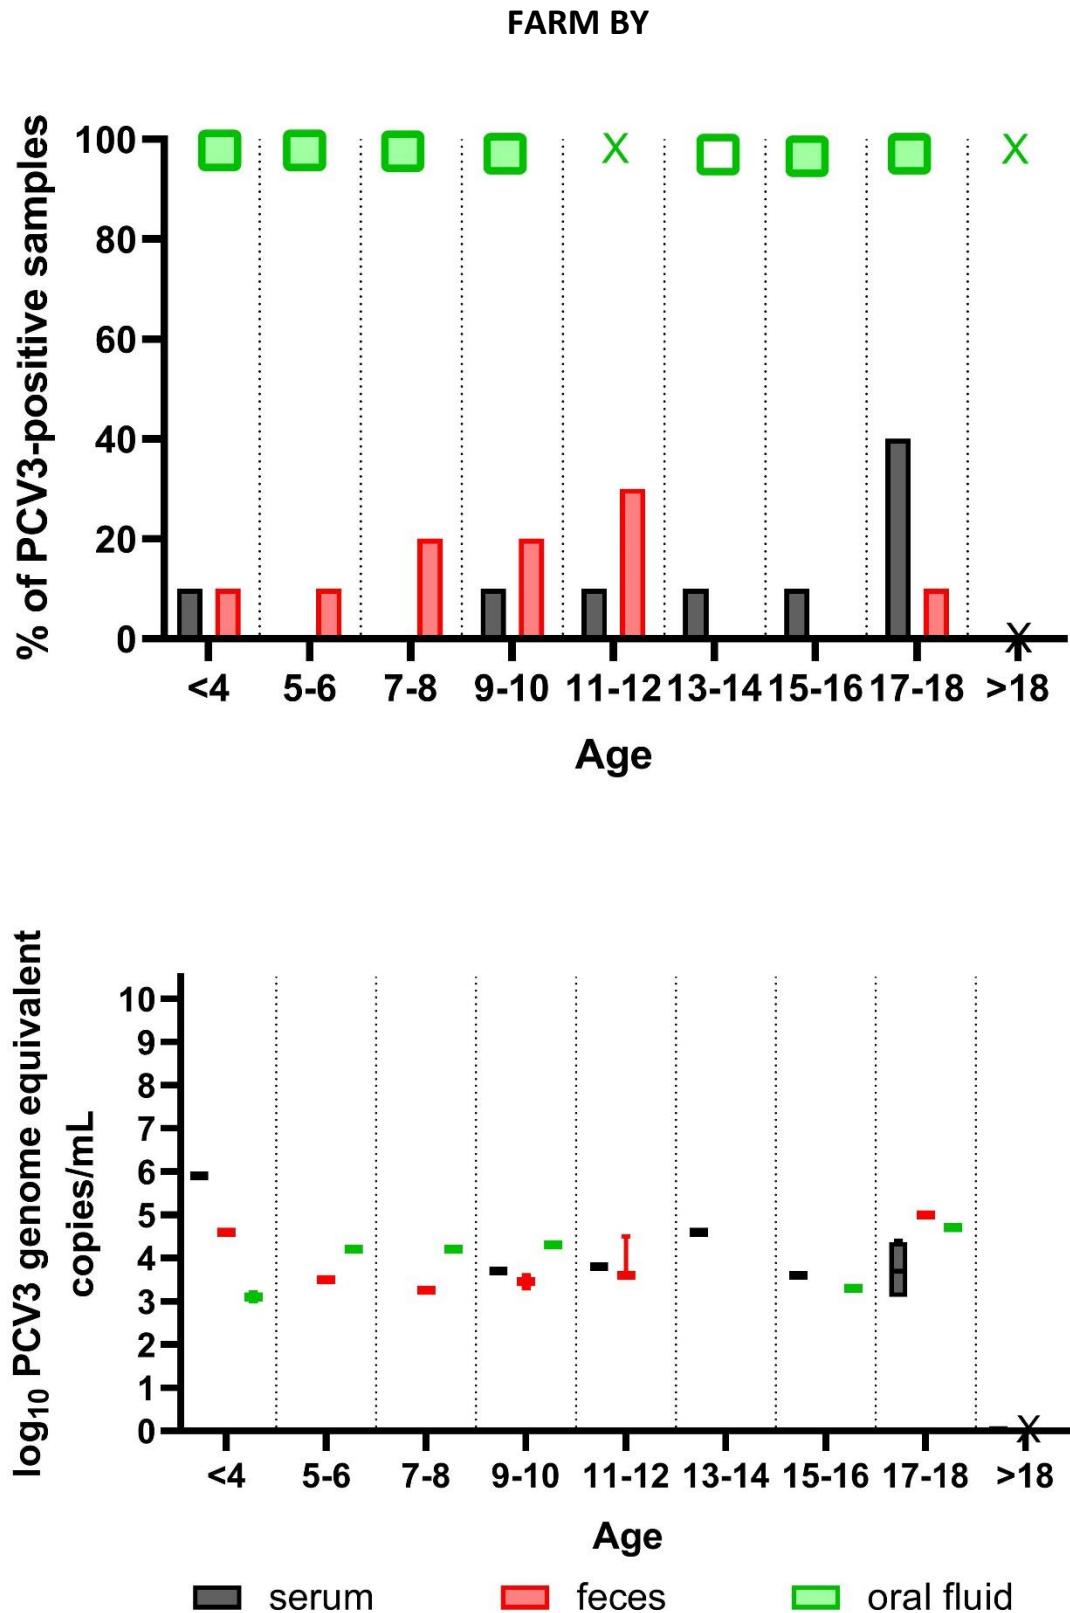

**Figure S1:** Percentages of porcine circovirus type 3 (PCV3)-positive samples and PCV3 viral loads ( $\log_{10}$  genome equivalent copies/mL) in different age groups in examined farms. Age groups with at least one oral fluid PCV3-positive are marked with a solid green square. An empty green square indicates that oral fluids reacted negative for PCV3. The whisker plot shows minimum and maximum. "X" on axis X indicates age group, which was not sampled. A green mark "X" indicates a group, where oral fluid was not obtained. Age is expressed in weeks.

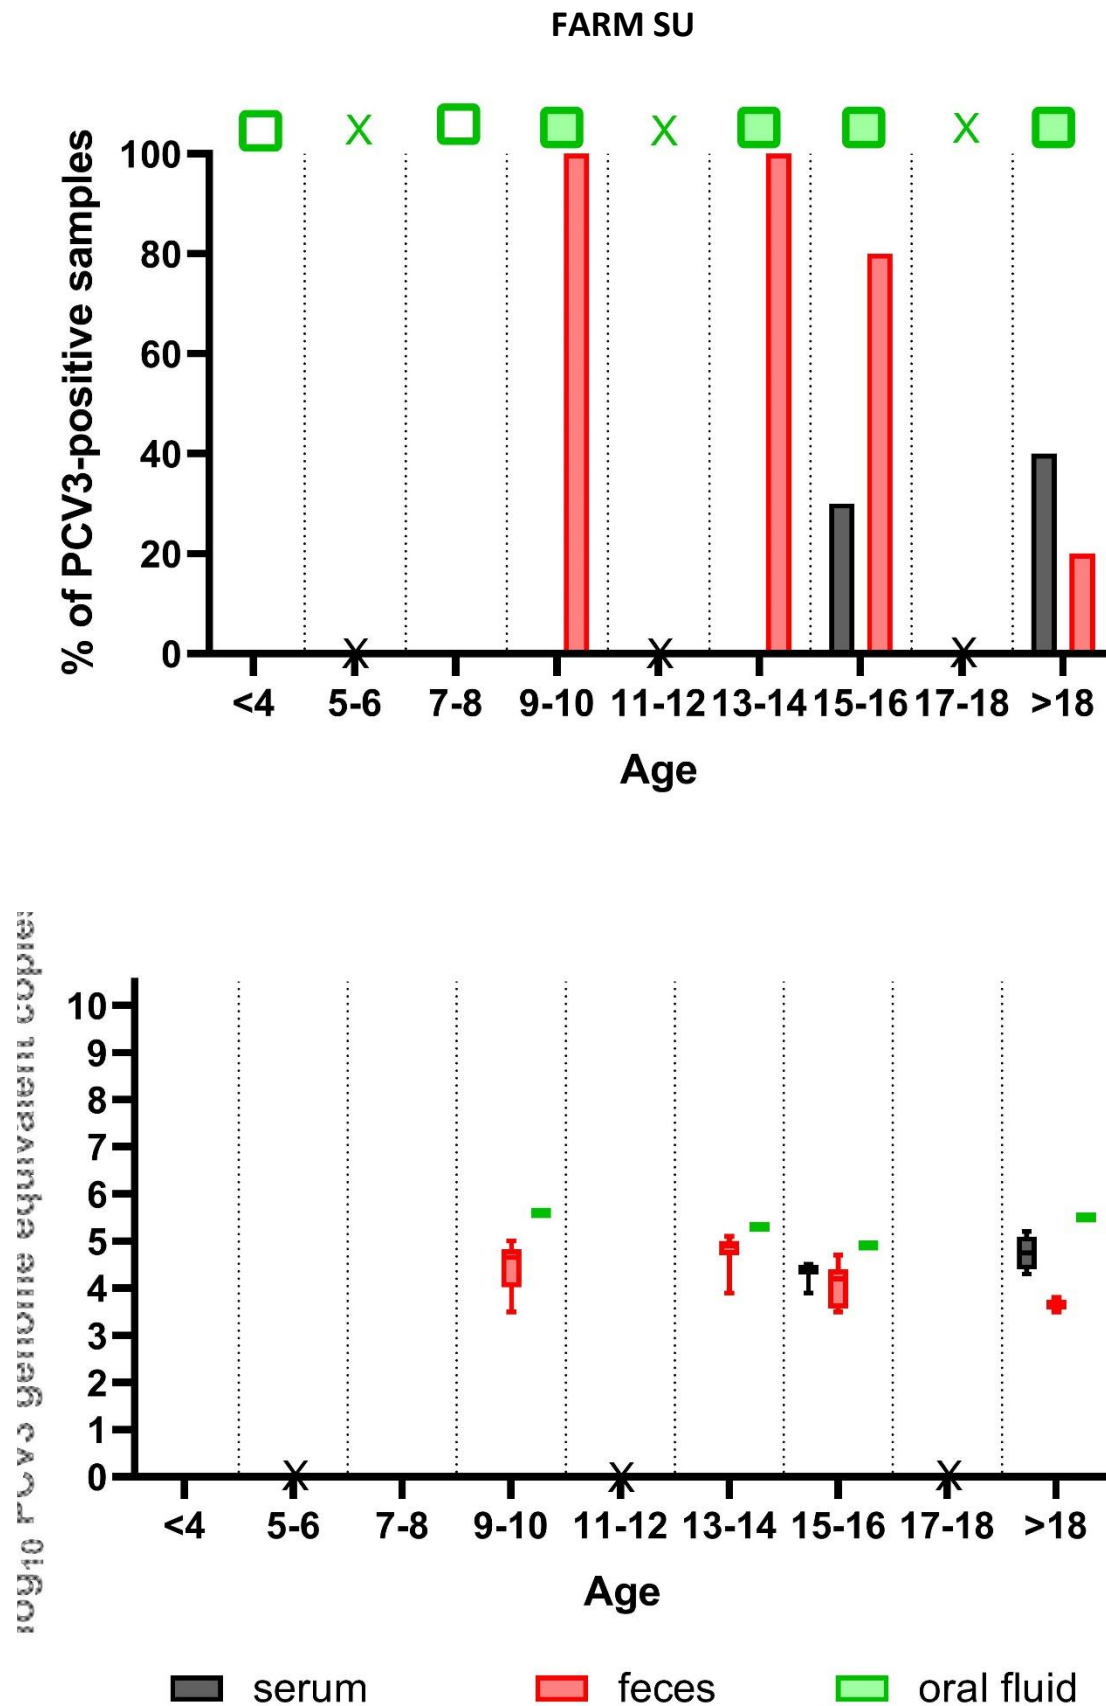

**Figure S1:** Percentages of porcine circovirus type 3 (PCV3)-positive samples and PCV3 viral loads ( $\log_{10}$  genome equivalent copies/mL) in different age groups in examined farms. Age groups with at least one oral fluid PCV3-positive are marked with a solid green square. An empty green square indicates that oral fluids reacted negative for PCV3. The whisker plot shows minimum and maximum. "X" on axis X indicates age group, which was not sampled. A green mark "X" indicates a group, where oral fluid was not obtained. Age is expressed in weeks.

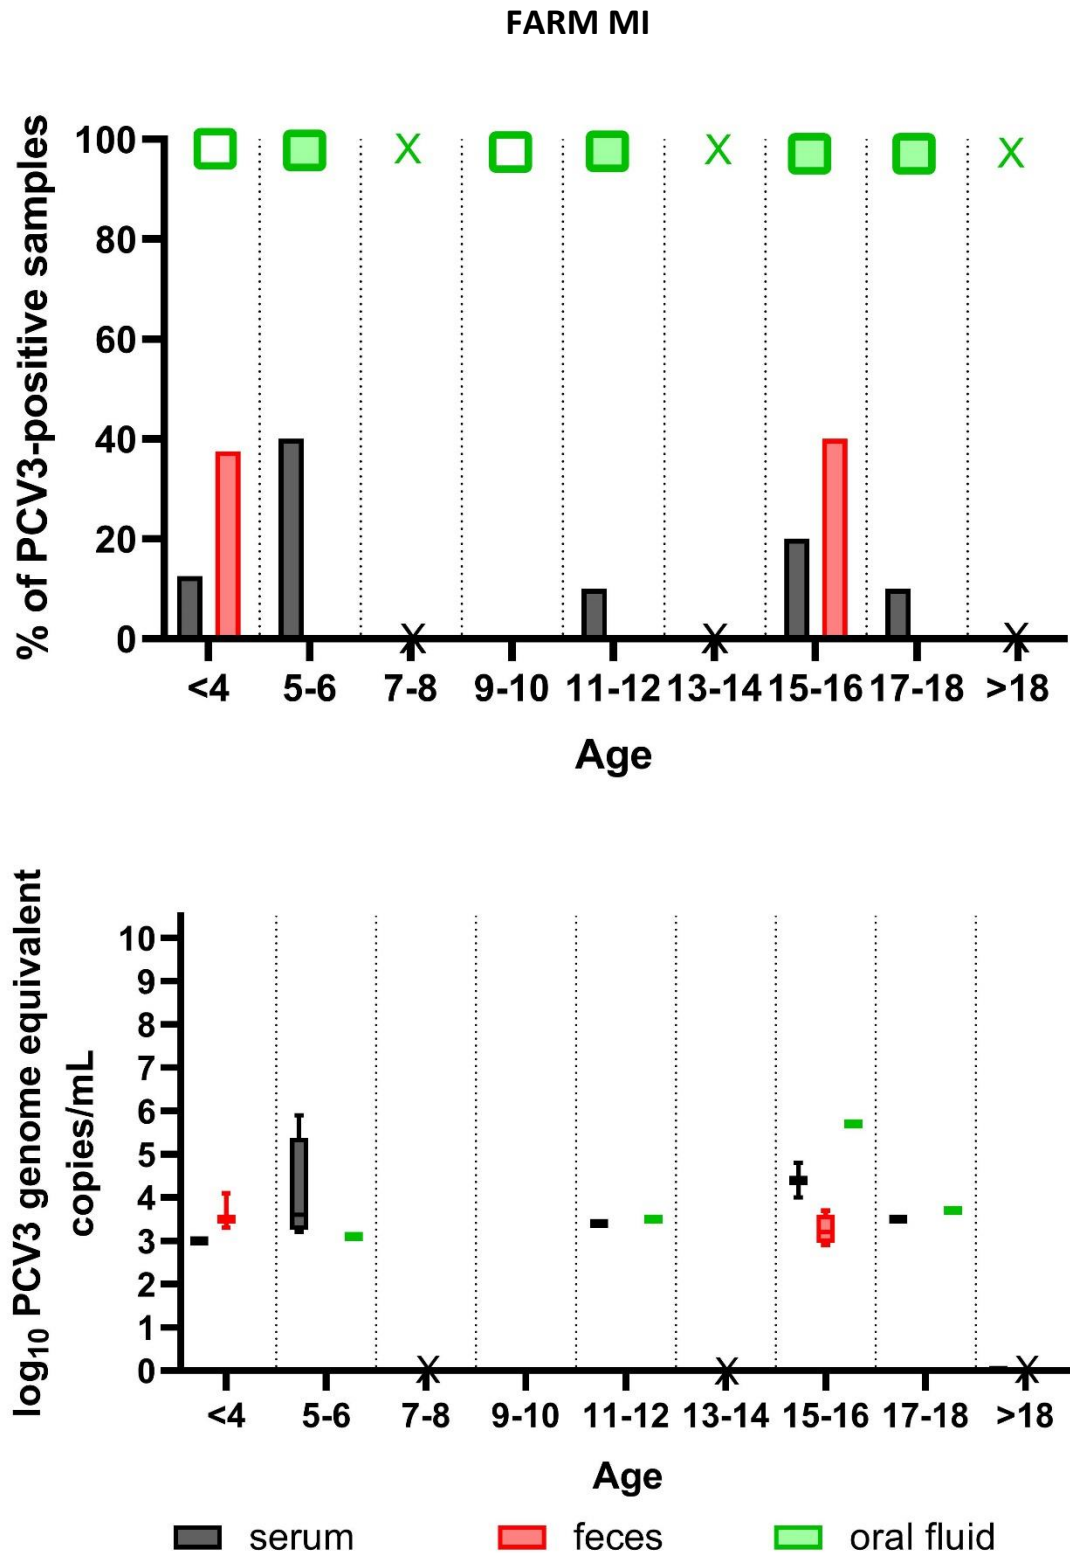

**Figure S1:** Percentages of porcine circovirus type 3 (PCV3)-positive samples and PCV3 viral loads (log<sub>10</sub> genome equivalent copies/mL) in different age groups in examined farms. Age groups with at least one oral fluid PCV3-positive are marked with a solid green square. An empty green square indicates that oral fluids reacted negative for PCV3. The whisker plot shows minimum and maximum. "X" on axis X indicates age group, which was not sampled. A green mark "X" indicates a group, where oral fluid was not obtained. Age is expressed in weeks.

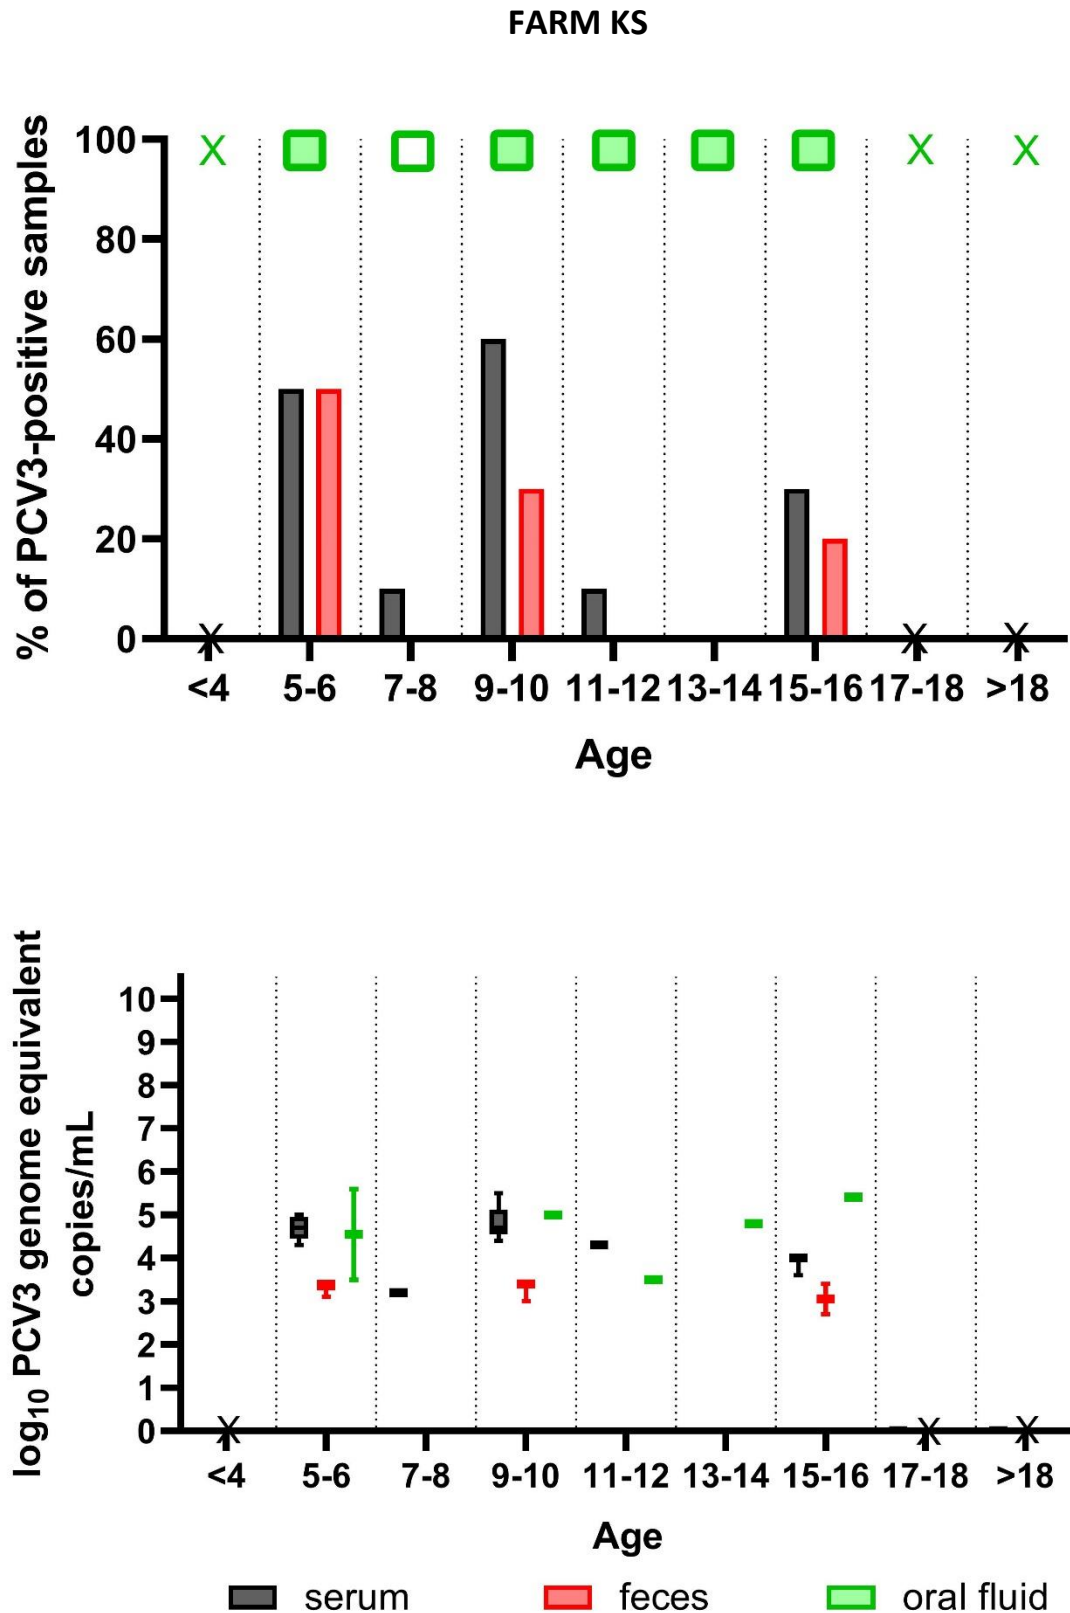

**Figure S1:** Percentages of porcine circovirus type 3 (PCV3)-positive samples and PCV3 viral loads (log<sub>10</sub> genome equivalent copies/mL) in different age groups in examined farms. Age groups with at least one oral fluid PCV3-positive are marked with a solid green square. An empty green square indicates that oral fluids reacted negative for PCV3. The whisker plot shows minimum and maximum. "X" on axis X indicates age group, which was not sampled. A green mark "X" indicates a group, where oral fluid was not obtained. Age is expressed in weeks.



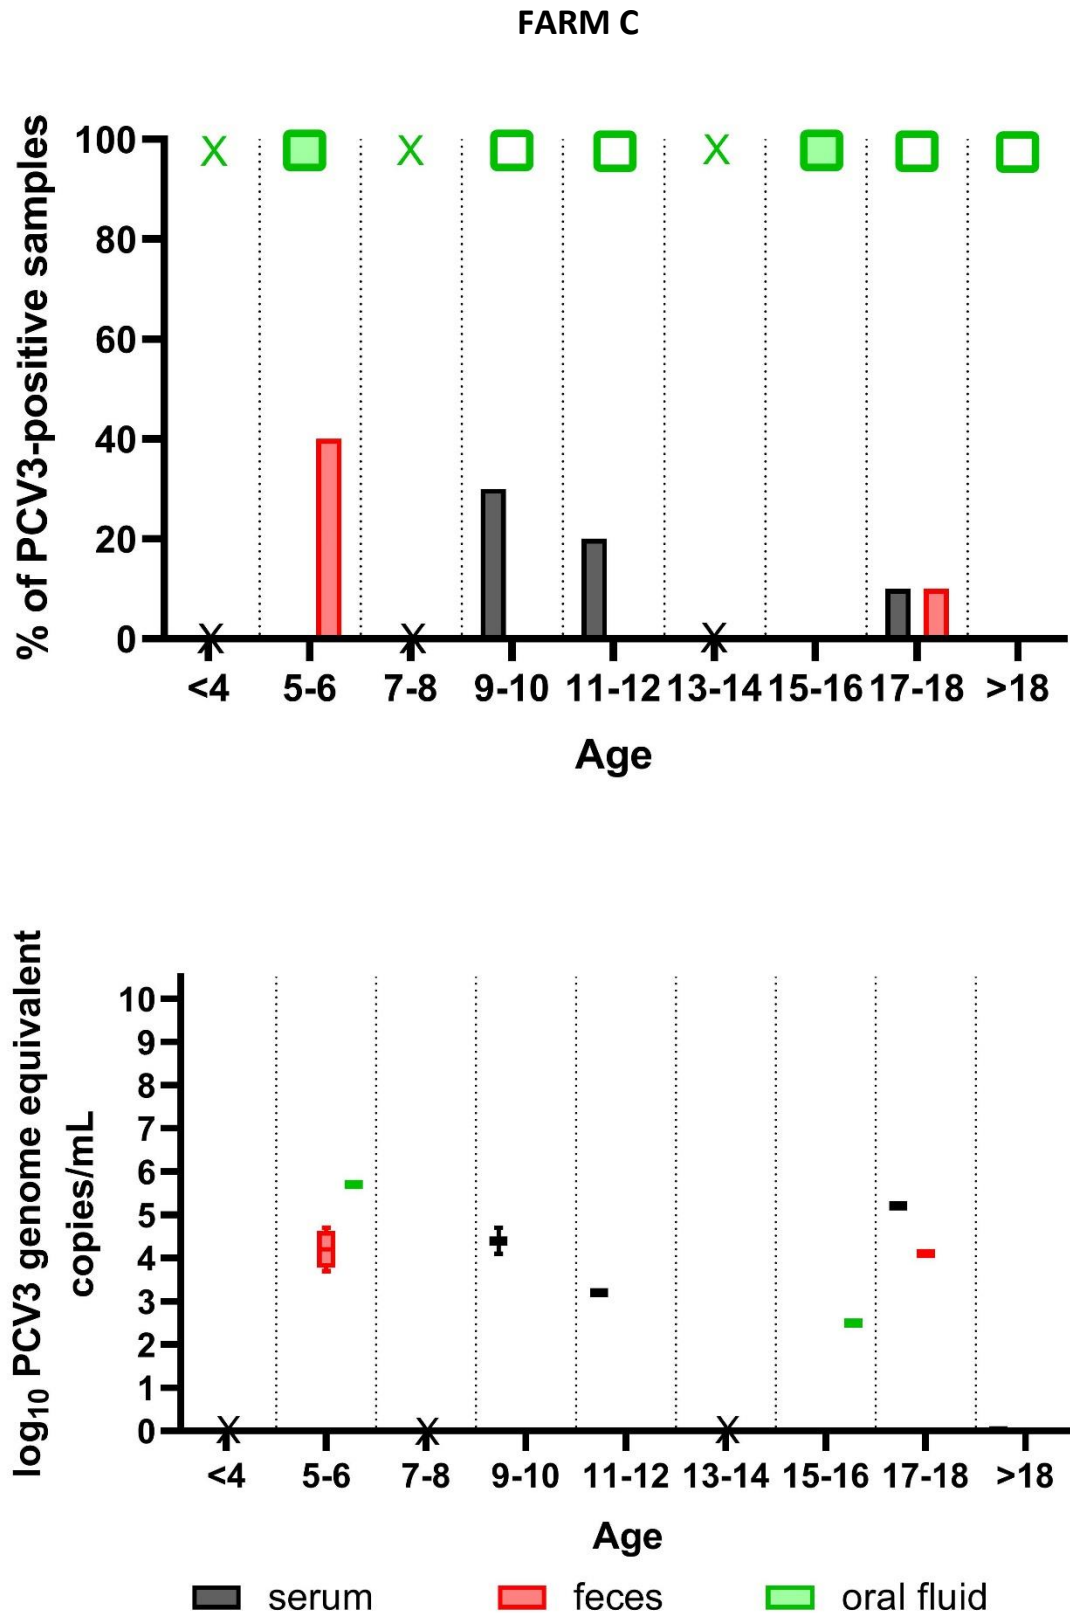

**Figure S1:** Percentages of porcine circovirus type 3 (PCV3)-positive samples and PCV3 viral loads ( $\log_{10}$  genome equivalent copies/mL) in different age groups in examined farms. Age groups with at least one oral fluid PCV3-positive are marked with a solid green square. An empty green square indicates that oral fluids reacted negative for PCV3. The whisker plot shows minimum and maximum. "X" on axis X indicates age group, which was not sampled. A green mark "X" indicates a group, where oral fluid was not obtained. Age is expressed in weeks.



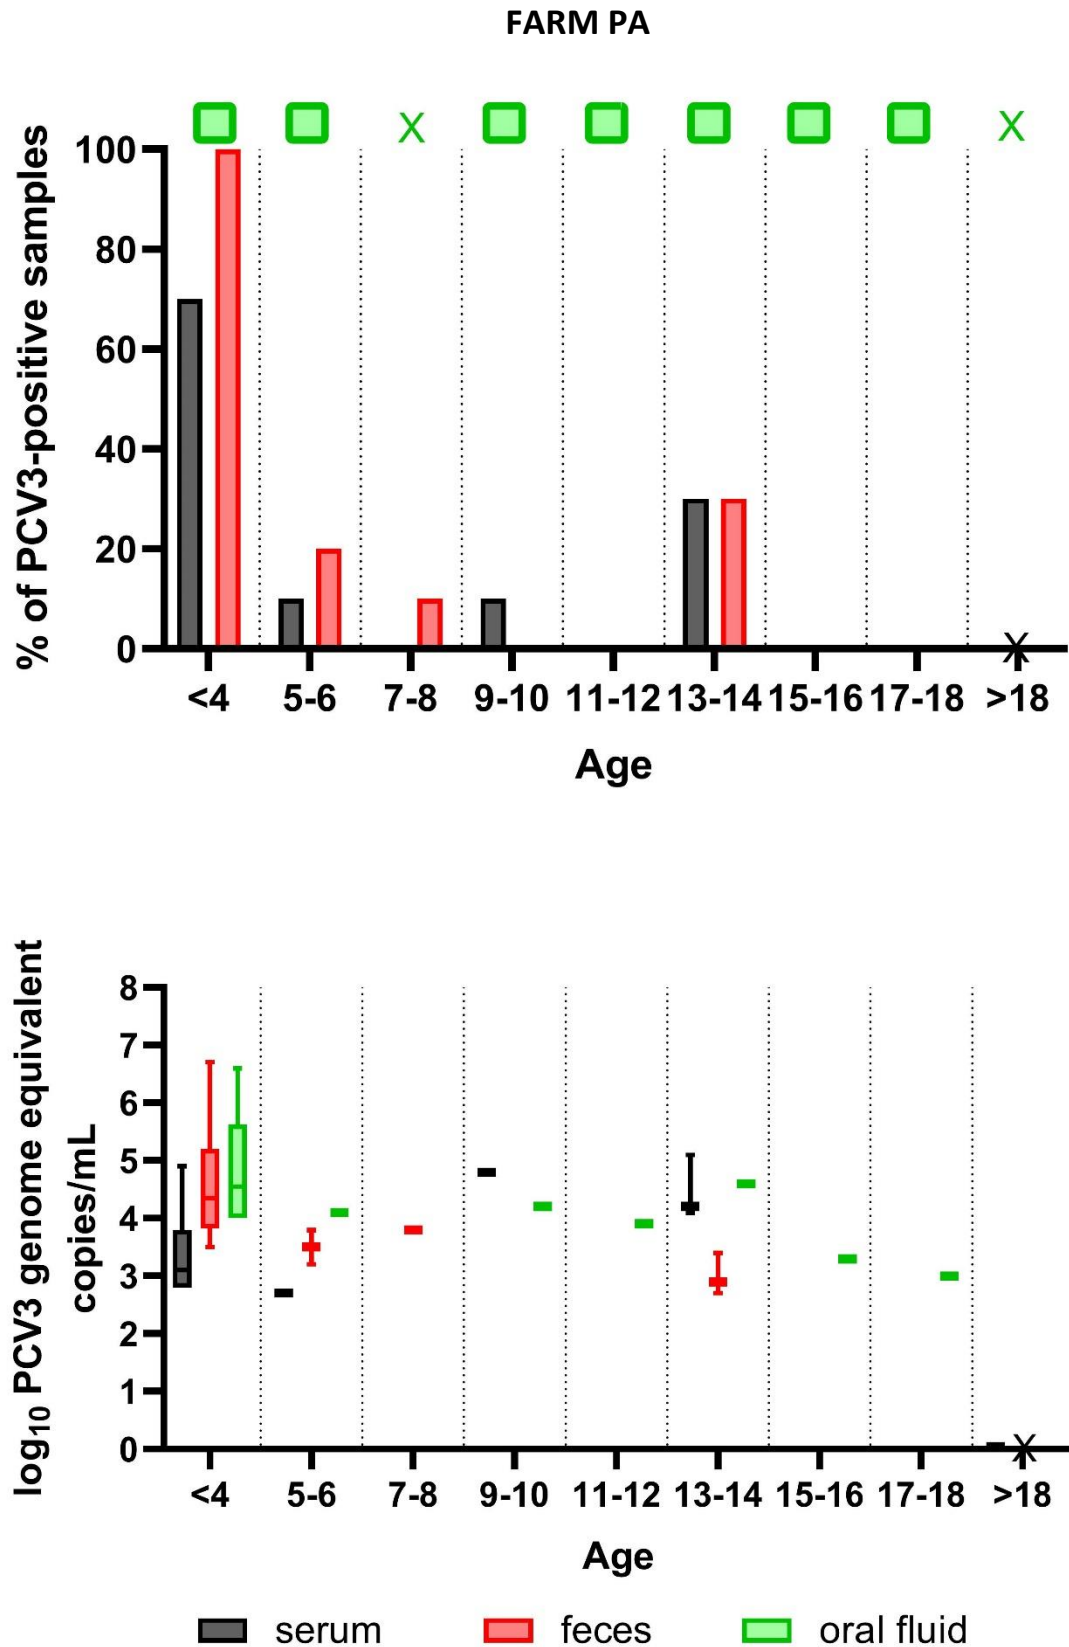

**Figure S1:** Percentages of porcine circovirus type 3 (PCV3)-positive samples and PCV3 viral loads ( $\log_{10}$  genome equivalent copies/mL) in different age groups in examined farms. Age groups with at least one oral fluid PCV3-positive are marked with a solid green square. An empty green square indicates that oral fluids reacted negative for PCV3. The whisker plot shows minimum and maximum. "X" on axis X indicates age group, which was not sampled. A green mark "X" indicates a group, where oral fluid was not obtained. Age is expressed in weeks.

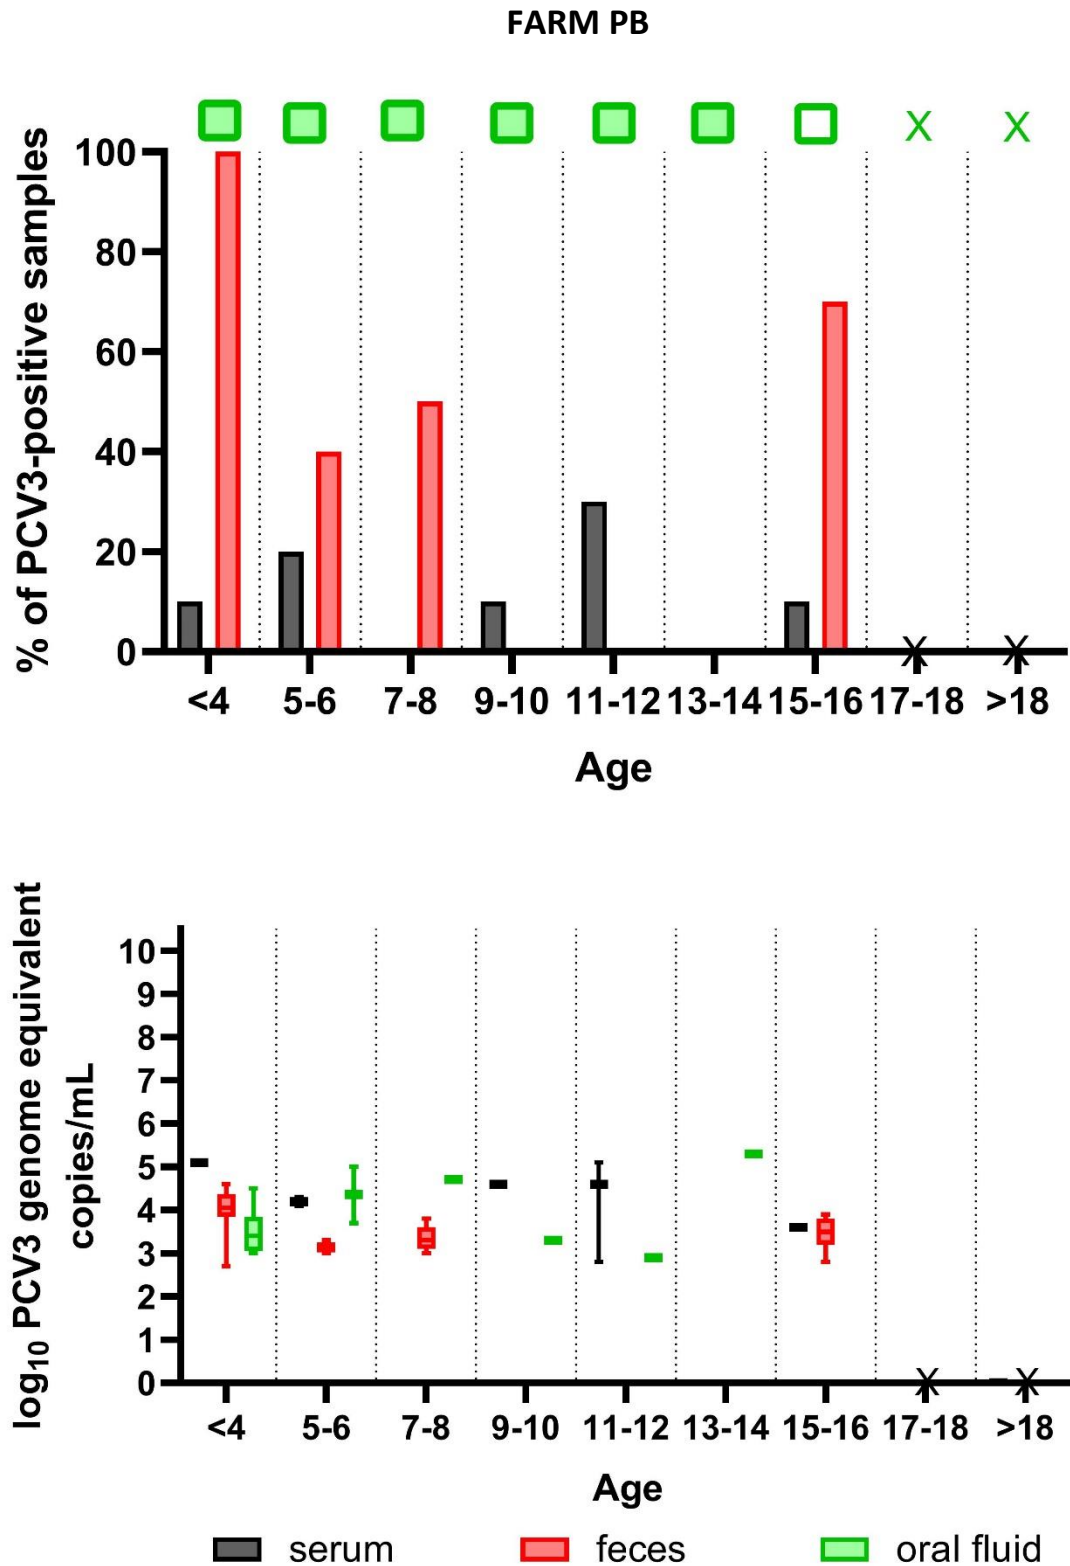

**Figure S1:** Percentages of porcine circovirus type 3 (PCV3)-positive samples and PCV3 viral loads ( $\log_{10}$  genome equivalent copies/mL) in different age groups in examined farms. Age groups with at least one oral fluid PCV3-positive are marked with a solid green square. An empty green square indicates that oral fluids reacted negative for PCV3. The whisker plot shows minimum and maximum. "X" on axis X indicates age group, which was not sampled. A green mark "X" indicates a group, where oral fluid was not obtained. Age is expressed in weeks.

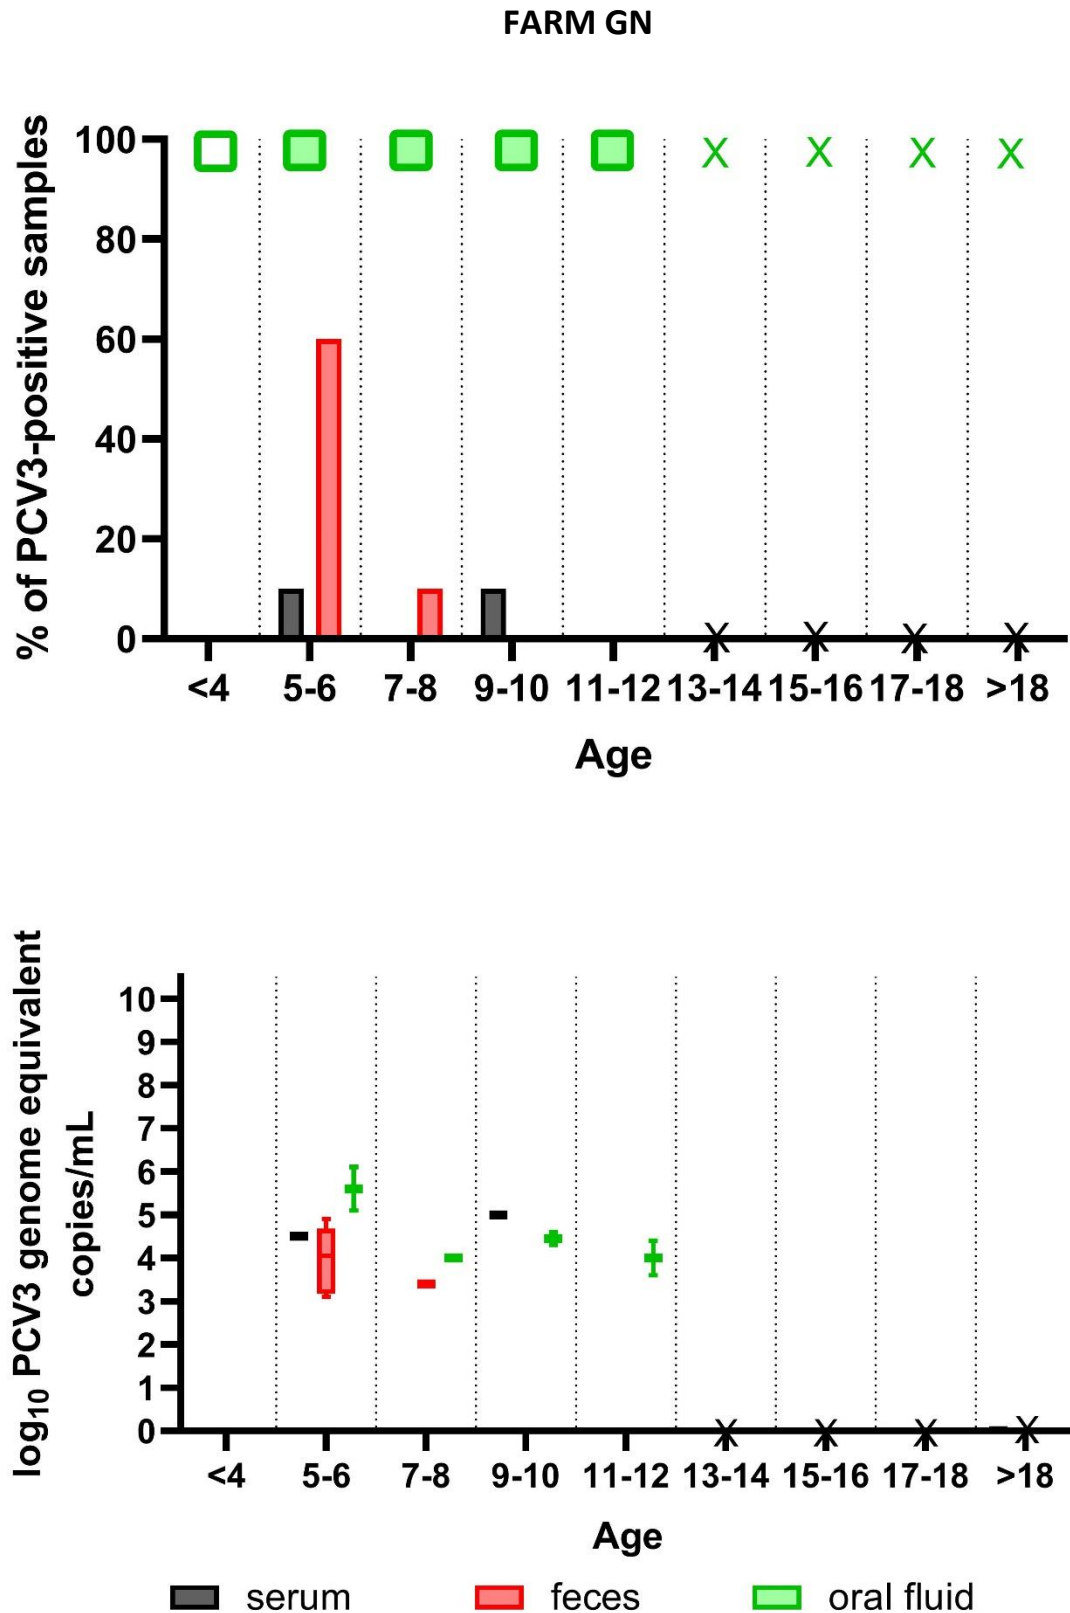

**Figure S1:** Percentages of porcine circovirus type 3 (PCV3)-positive samples and PCV3 viral loads ( $\log_{10}$  genome equivalent copies/mL) in different age groups in examined farms. Age groups with at least one oral fluid PCV3-positive are marked with a solid green square. An empty green square indicates that oral fluids reacted negative for PCV3. The whisker plot shows minimum and maximum. "X" on axis X indicates age group, which was not sampled. A green mark "X" indicates a group, where oral fluid was not obtained. Age is expressed in weeks.

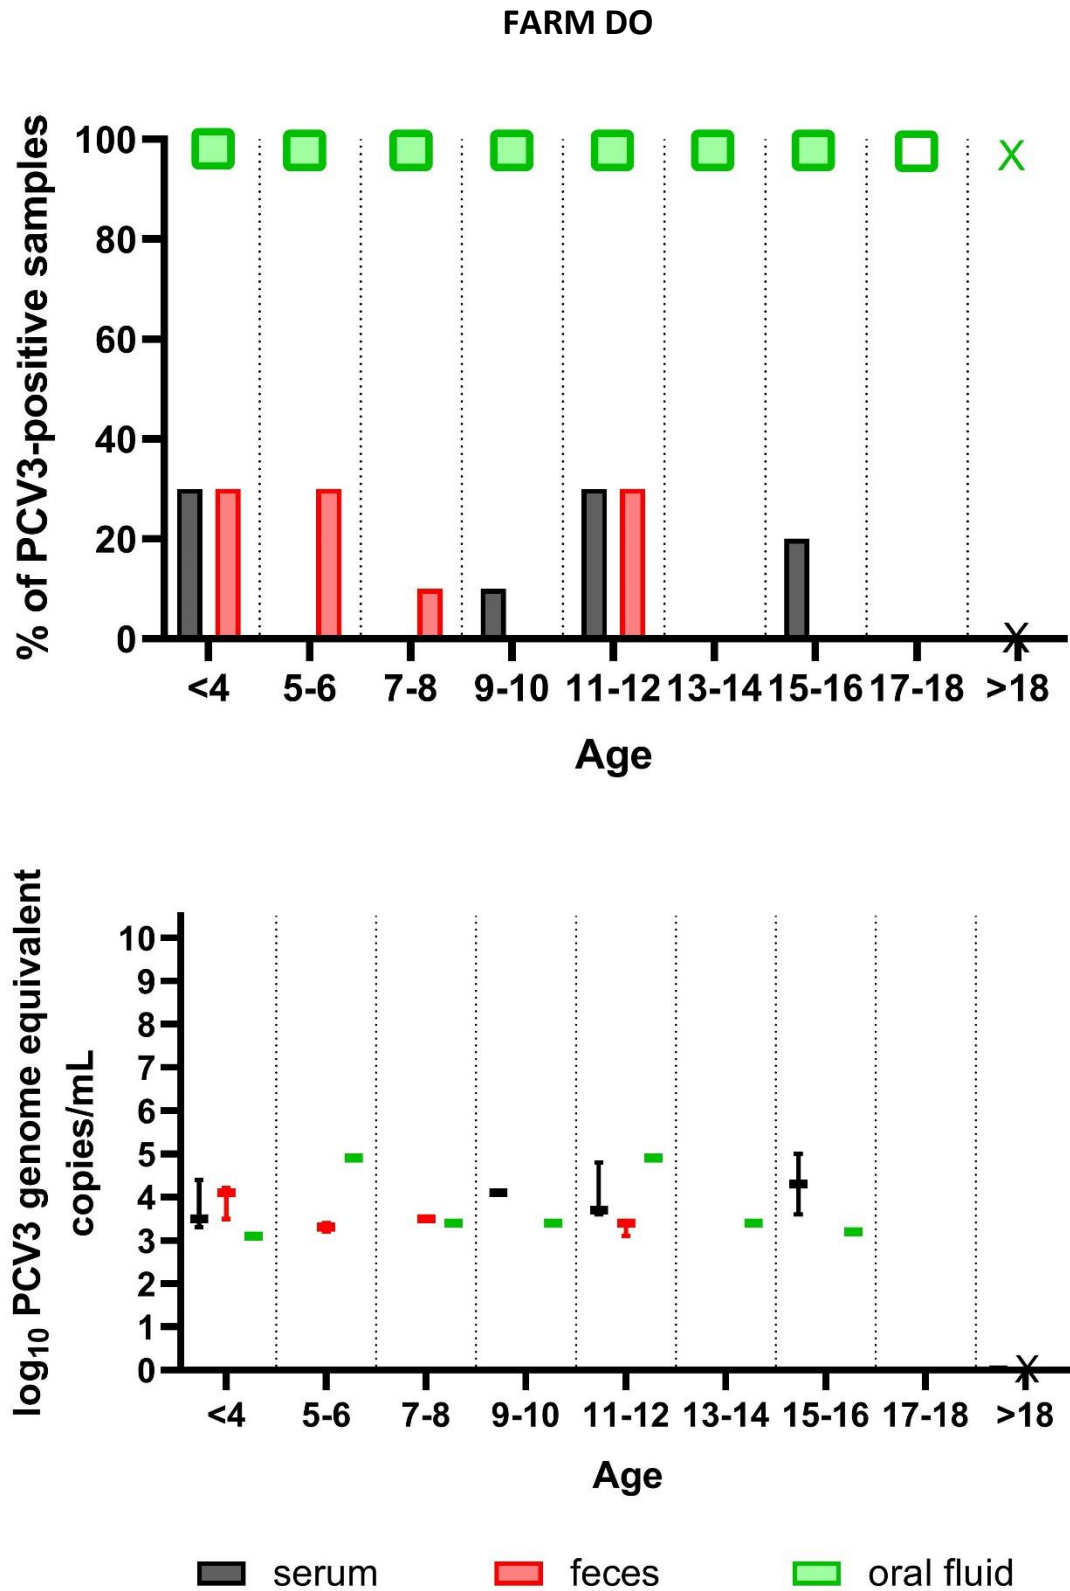

**Figure S1:** Percentages of porcine circovirus type 3 (PCV3)-positive samples and PCV3 viral loads ( $\log_{10}$  genome equivalent copies/mL) in different age groups in examined farms. Age groups with at least one oral fluid PCV3-positive are marked with a solid green square. An empty green square indicates that oral fluids reacted negative for PCV3. The whisker plot shows minimum and maximum. "X" on axis X indicates age group, which was not sampled. A green mark "X" indicates a group, where oral fluid was not obtained. Age is expressed in weeks.

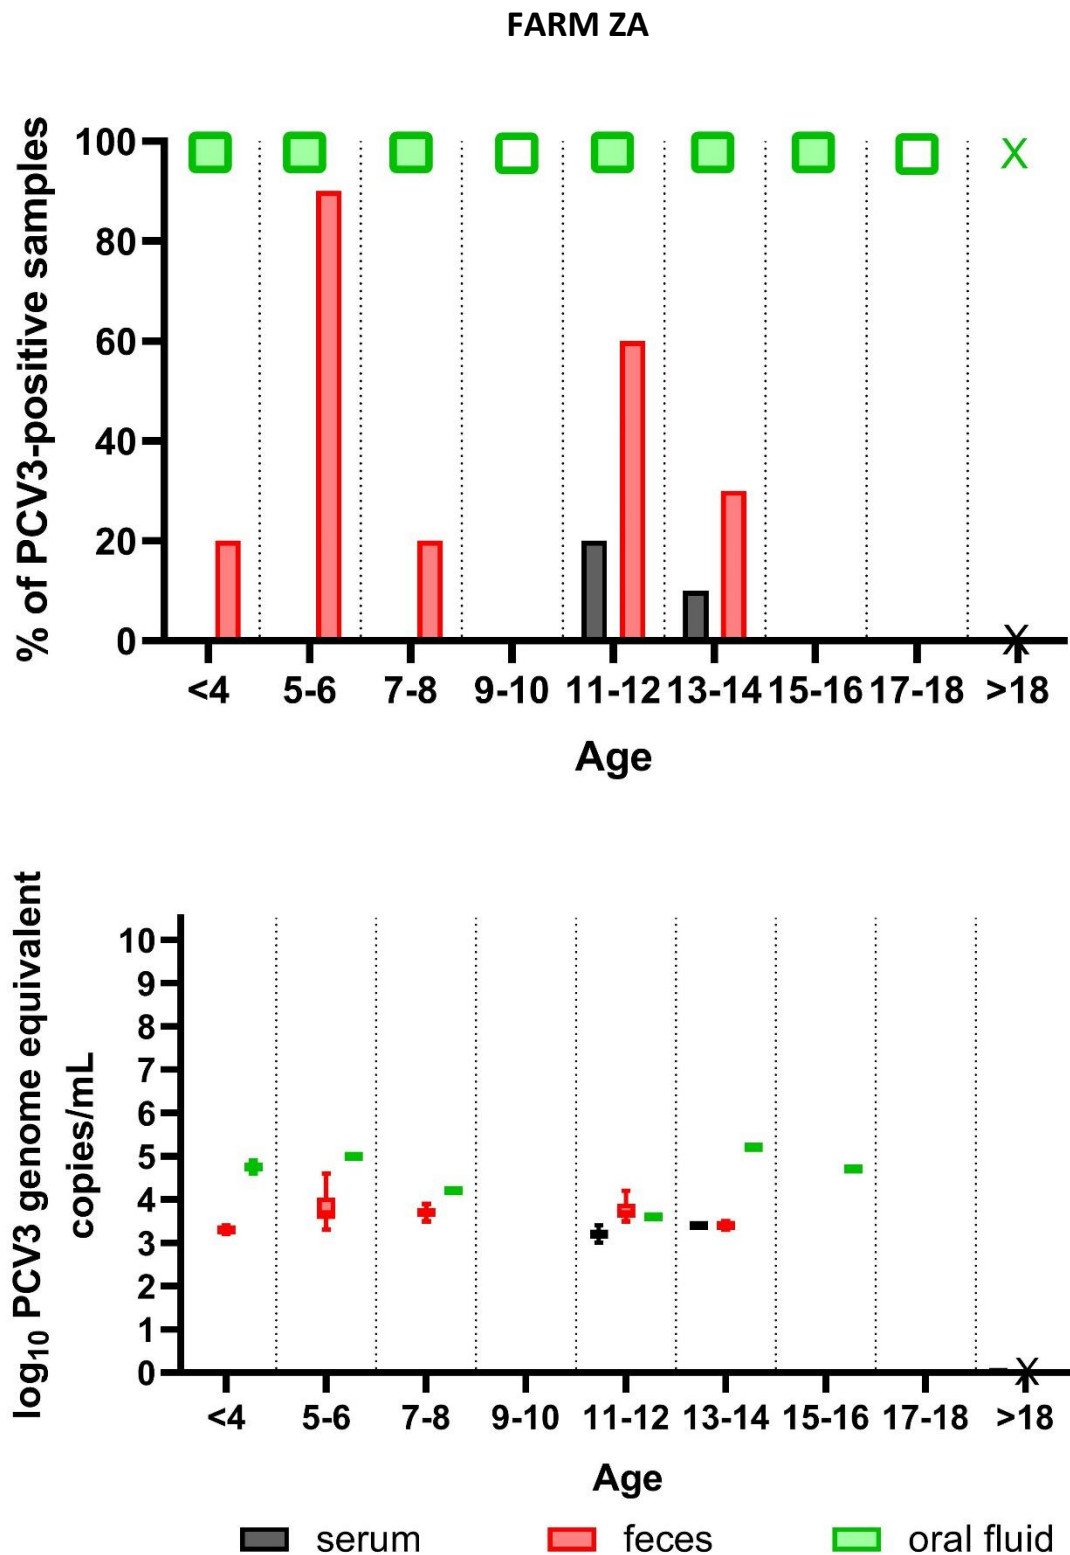

**Figure S1:** Percentages of porcine circovirus type 3 (PCV3)-positive samples and PCV3 viral loads (log<sub>10</sub> genome equivalent copies/mL) in different age groups in examined farms. Age groups with at least one oral fluid PCV3-positive are marked with a solid green square. An empty green square indicates that oral fluids reacted negative for PCV3. The whisker plot shows minimum and maximum. "X" on axis X indicates age group, which was not sampled. A green mark "X" indicates a group, where oral fluid was not obtained. Age is expressed in weeks.

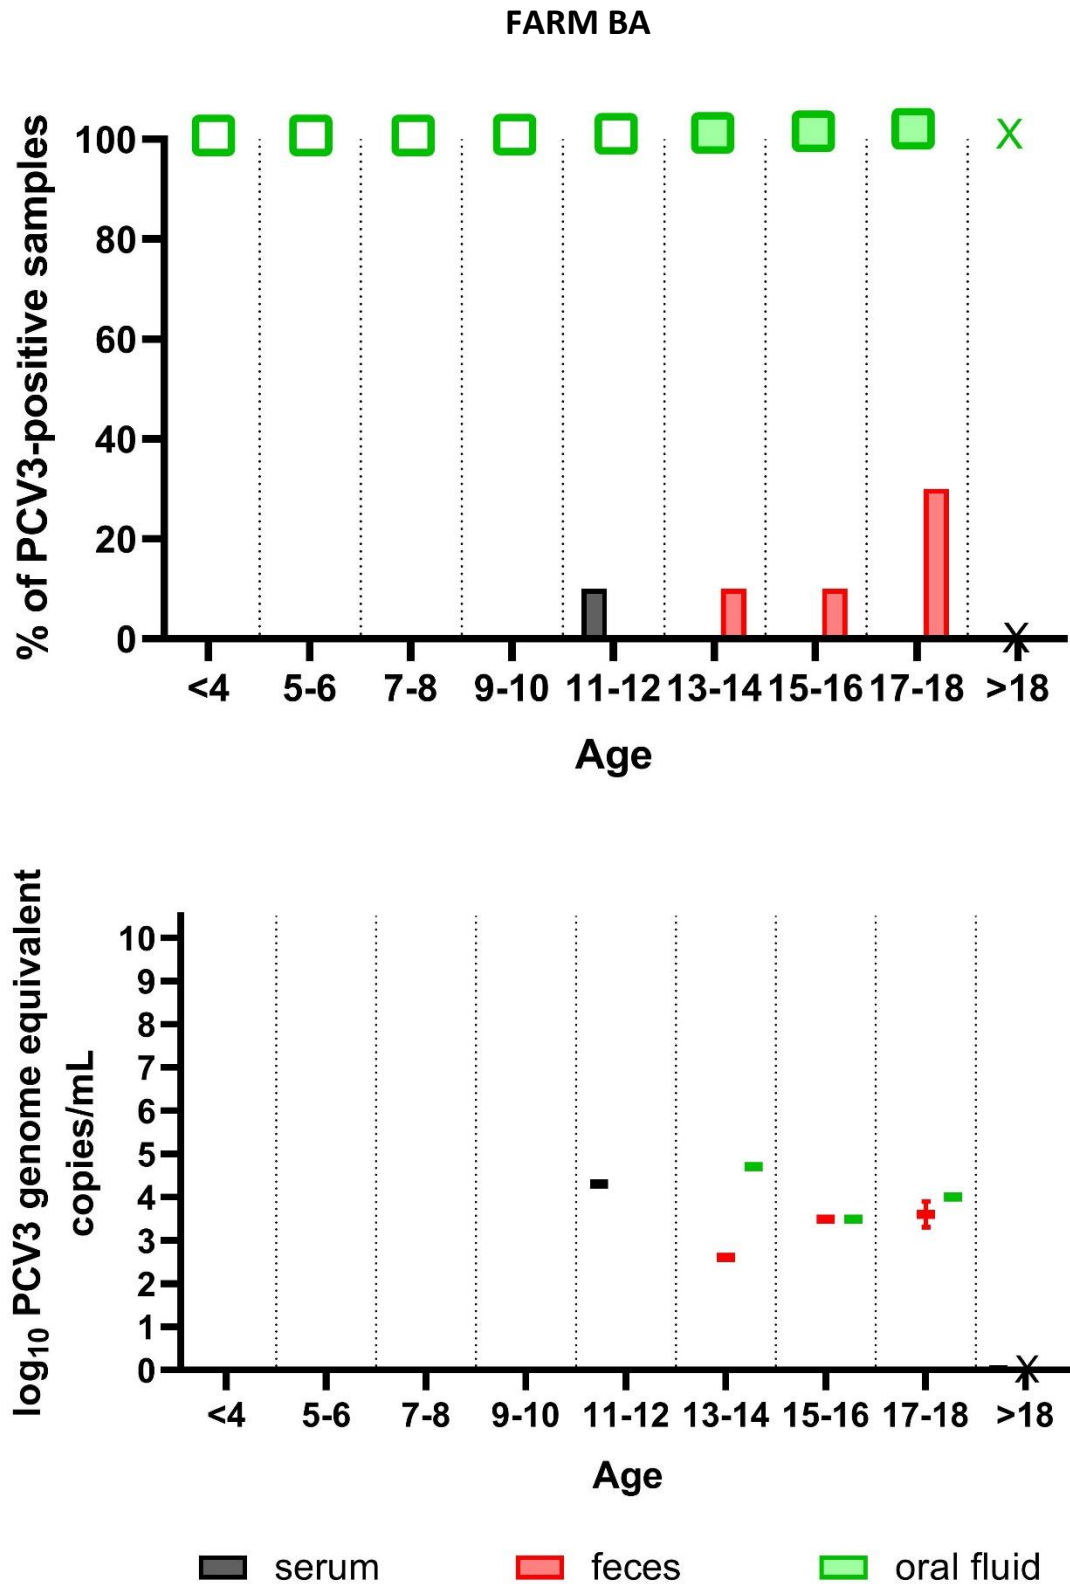

**Figure S1:** Percentages of porcine circovirus type 3 (PCV3)-positive samples and PCV3 viral loads ( $\log_{10}$  genome equivalent copies/mL) in different age groups in examined farms. Age groups with at least one oral fluid PCV3-positive are marked with a solid green square. An empty green square indicates that oral fluids reacted negative for PCV3. The whisker plot shows minimum and maximum. "X" on axis X indicates age group, which was not sampled. A green mark "X" indicates a group, where oral fluid was not obtained. Age is expressed in weeks.

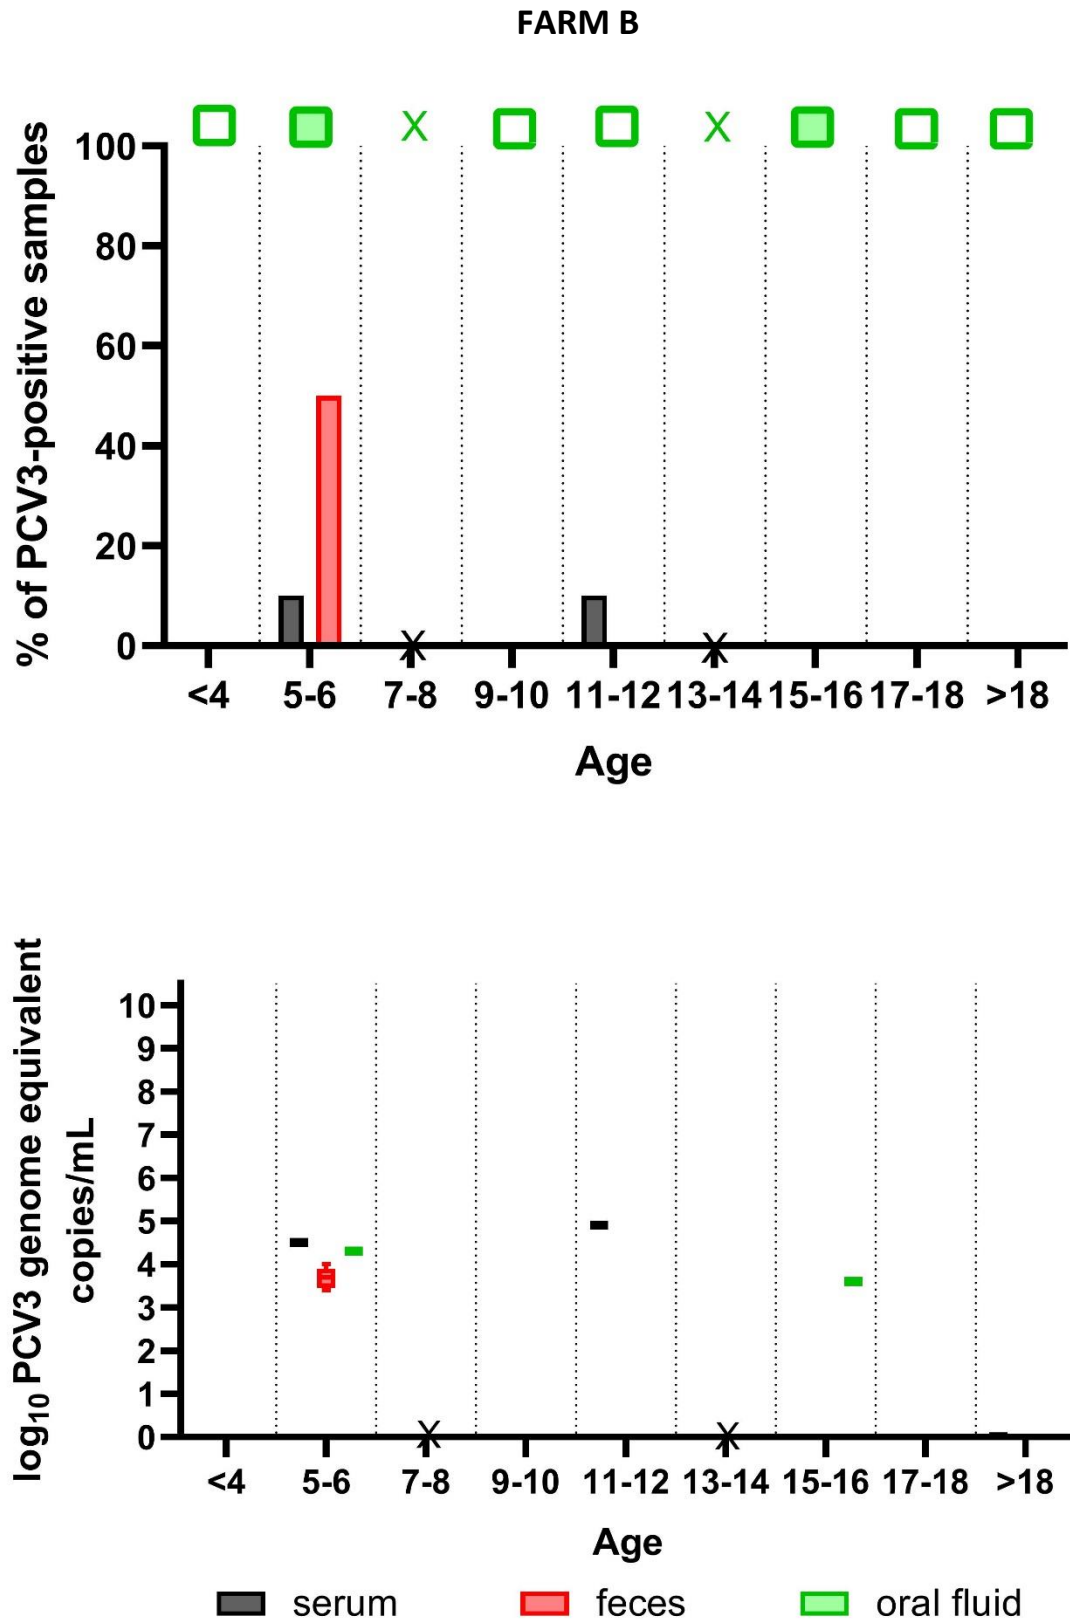

**Figure S1:** Percentages of porcine circovirus type 3 (PCV3)-positive samples and PCV3 viral loads ( $\log_{10}$  genome equivalent copies/mL) in different age groups in examined farms. Age groups with at least one oral fluid PCV3-positive are marked with a solid green square. An empty green square indicates that oral fluids reacted negative for PCV3. The whisker plot shows minimum and maximum. "X" on axis X indicates age group, which was not sampled. A green mark "X" indicates a group, where oral fluid was not obtained. Age is expressed in weeks.



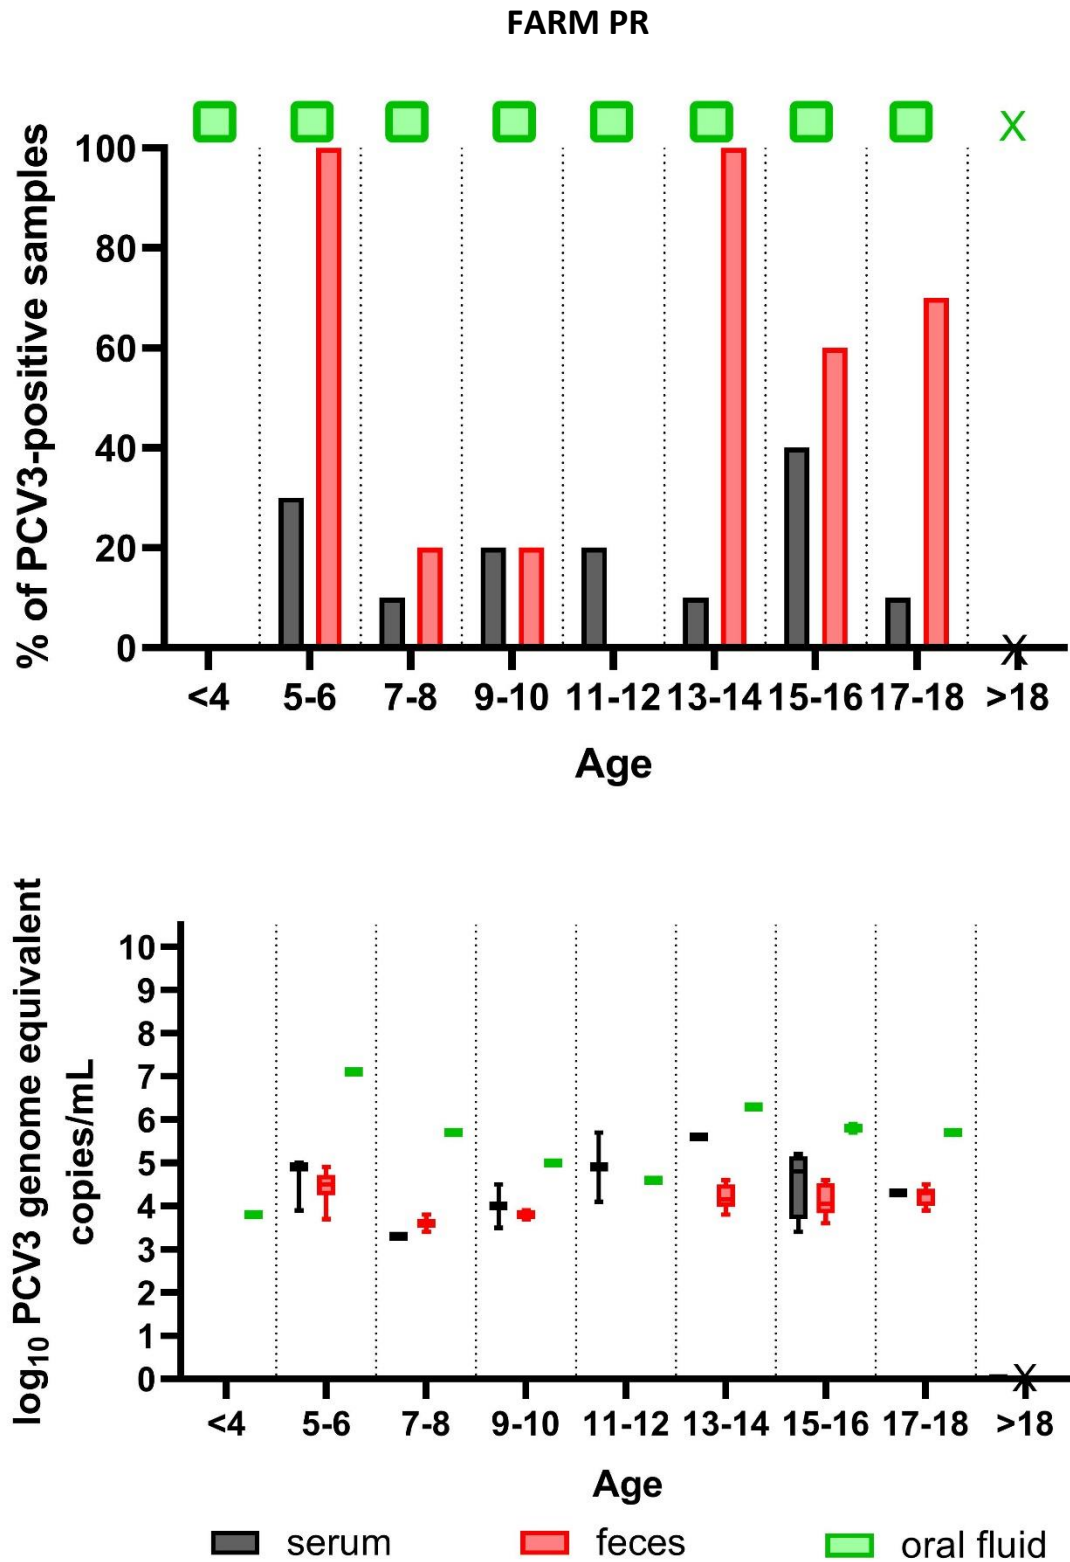

**Figure S1:** Percentages of porcine circovirus type 3 (PCV3)-positive samples and PCV3 viral loads (log<sub>10</sub> genome equivalent copies/mL) in different age groups in examined farms. Age groups with at least one oral fluid PCV3-positive are marked with a solid green square. An empty green square indicates that oral fluids reacted negative for PCV3. The whisker plot shows minimum and maximum. "X" on axis X indicates age group, which was not sampled. A green mark "X" indicates a group, where oral fluid was not obtained. Age is expressed in weeks.

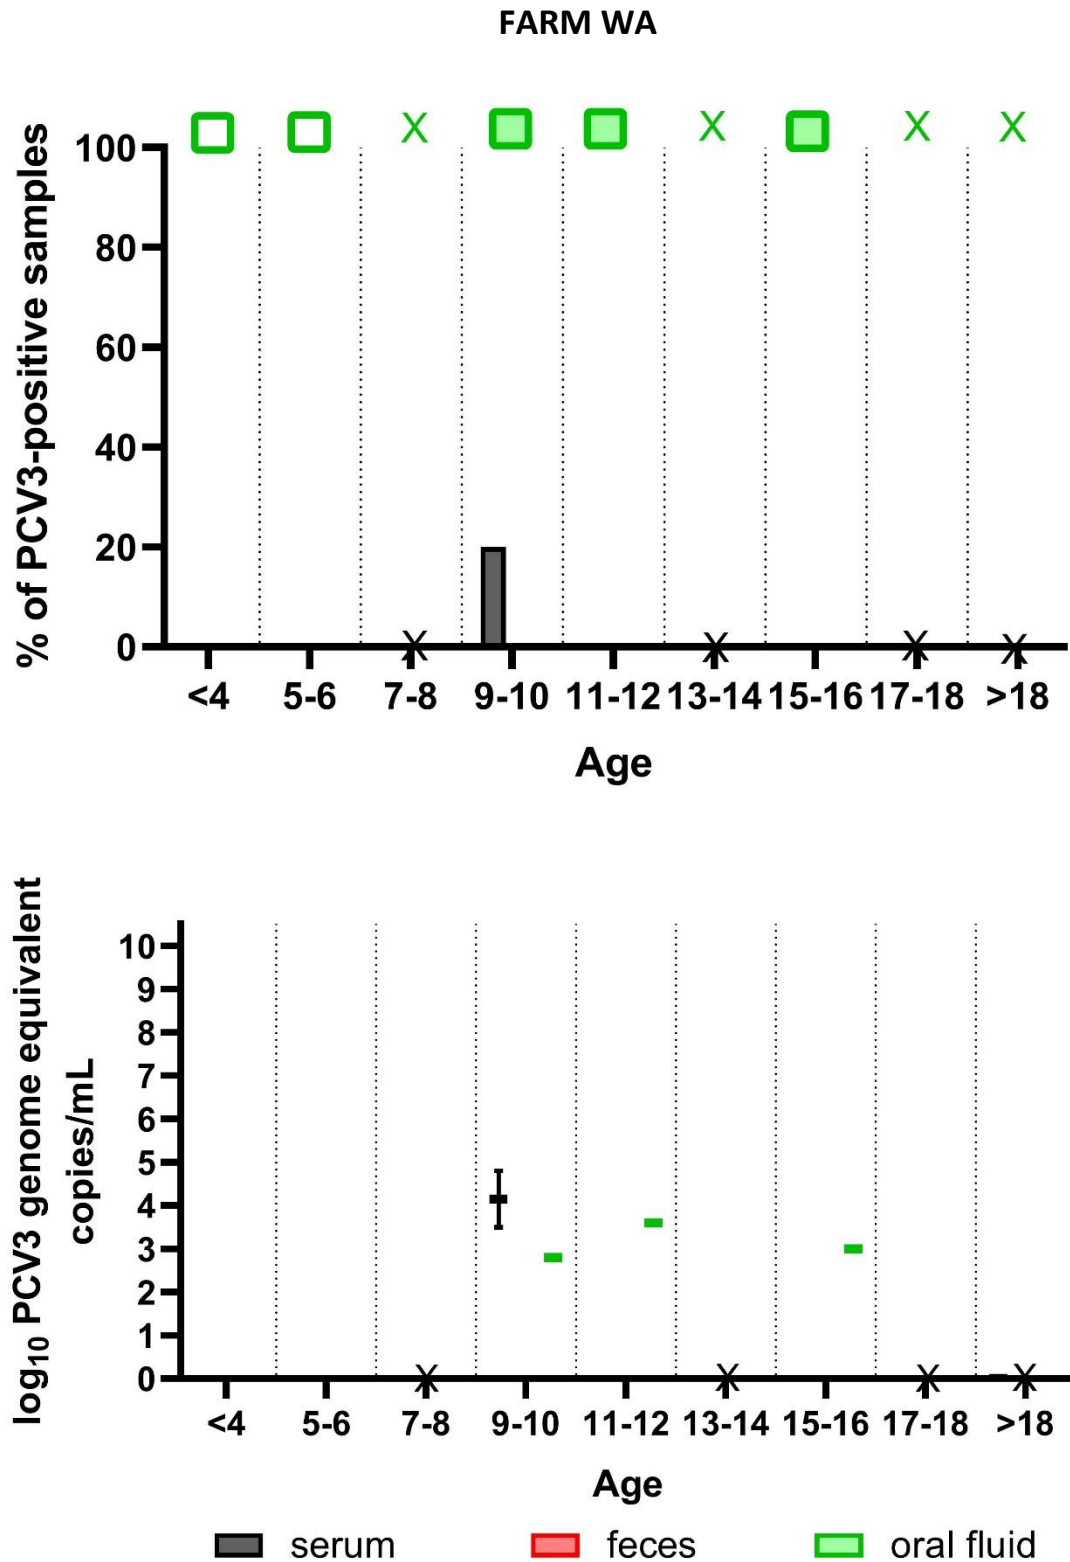

**Figure S1:** Percentages of porcine circovirus type 3 (PCV3)-positive samples and PCV3 viral loads ( $\log_{10}$  genome equivalent copies/mL) in different age groups in examined farms. Age groups with at least one oral fluid PCV3-positive are marked with a solid green square. An empty green square indicates that oral fluids reacted negative for PCV3. The whisker plot shows minimum and maximum. "X" on axis X indicates age group, which was not sampled. A green mark "X" indicates a group, where oral fluid was not obtained. Age is expressed in weeks.

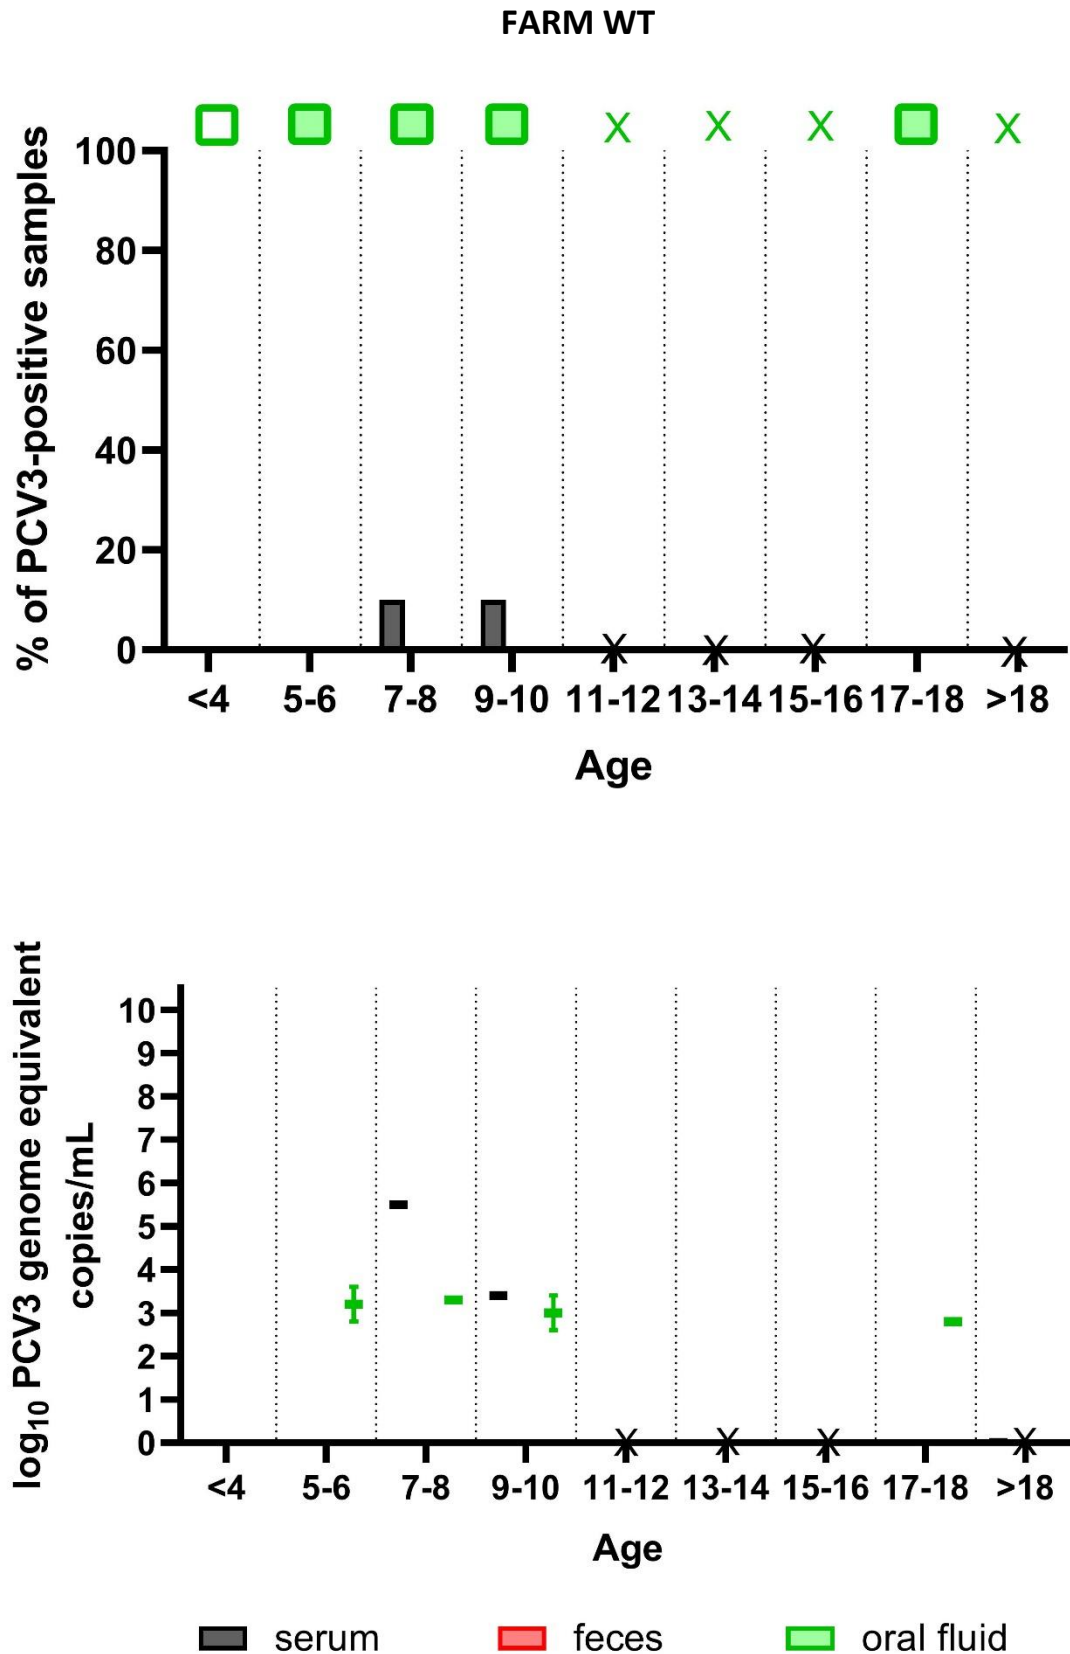

**Figure S1:** Percentages of porcine circovirus type 3 (PCV3)-positive samples and PCV3 viral loads ( $\log_{10}$  genome equivalent copies/mL) in different age groups in examined farms. Age groups with at least one oral fluid PCV3-positive are marked with a solid green square. An empty green square indicates that oral fluids reacted negative for PCV3. The whisker plot shows minimum and maximum. "X" on axis X indicates age group, which was not sampled. A green mark "X" indicates a group, where oral fluid was not obtained. Age is expressed in weeks.

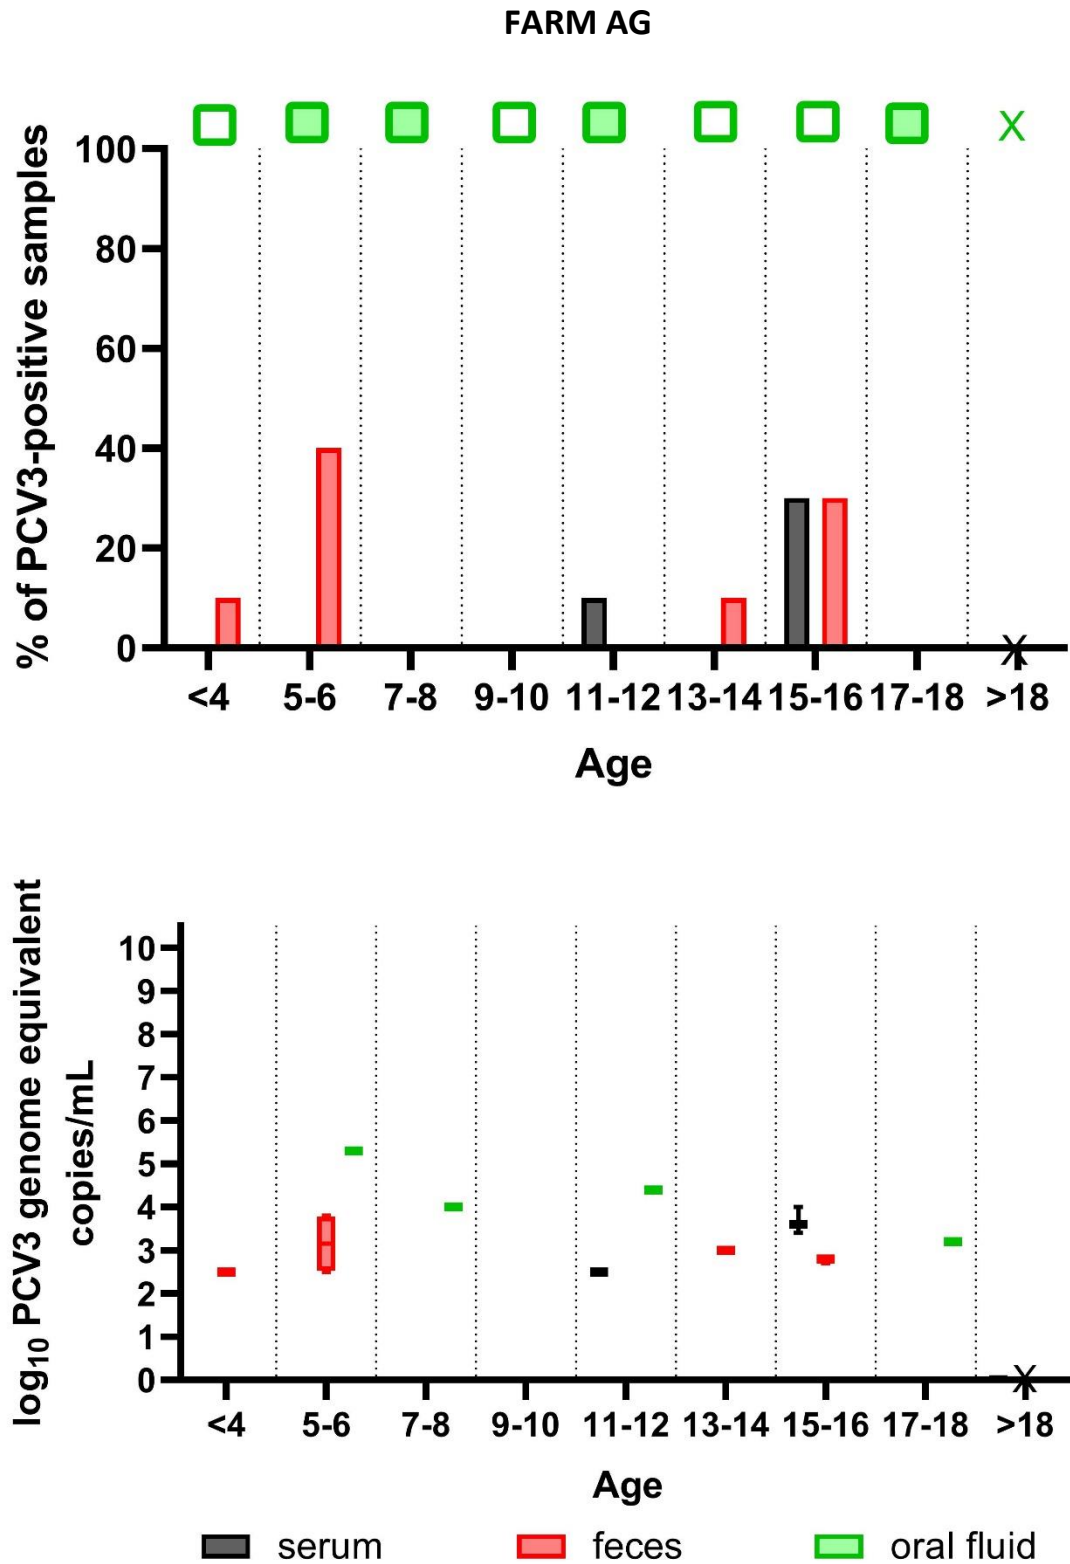

**Figure S1:** Percentages of porcine circovirus type 3 (PCV3)-positive samples and PCV3 viral loads ( $\log_{10}$  genome equivalent copies/mL) in different age groups in examined farms. Age groups with at least one oral fluid PCV3-positive are marked with a solid green square. An empty green square indicates that oral fluids reacted negative for PCV3. The whisker plot shows minimum and maximum. "X" on axis X indicates age group, which was not sampled. A green mark "X" indicates a group, where oral fluid was not obtained. Age is expressed in weeks.

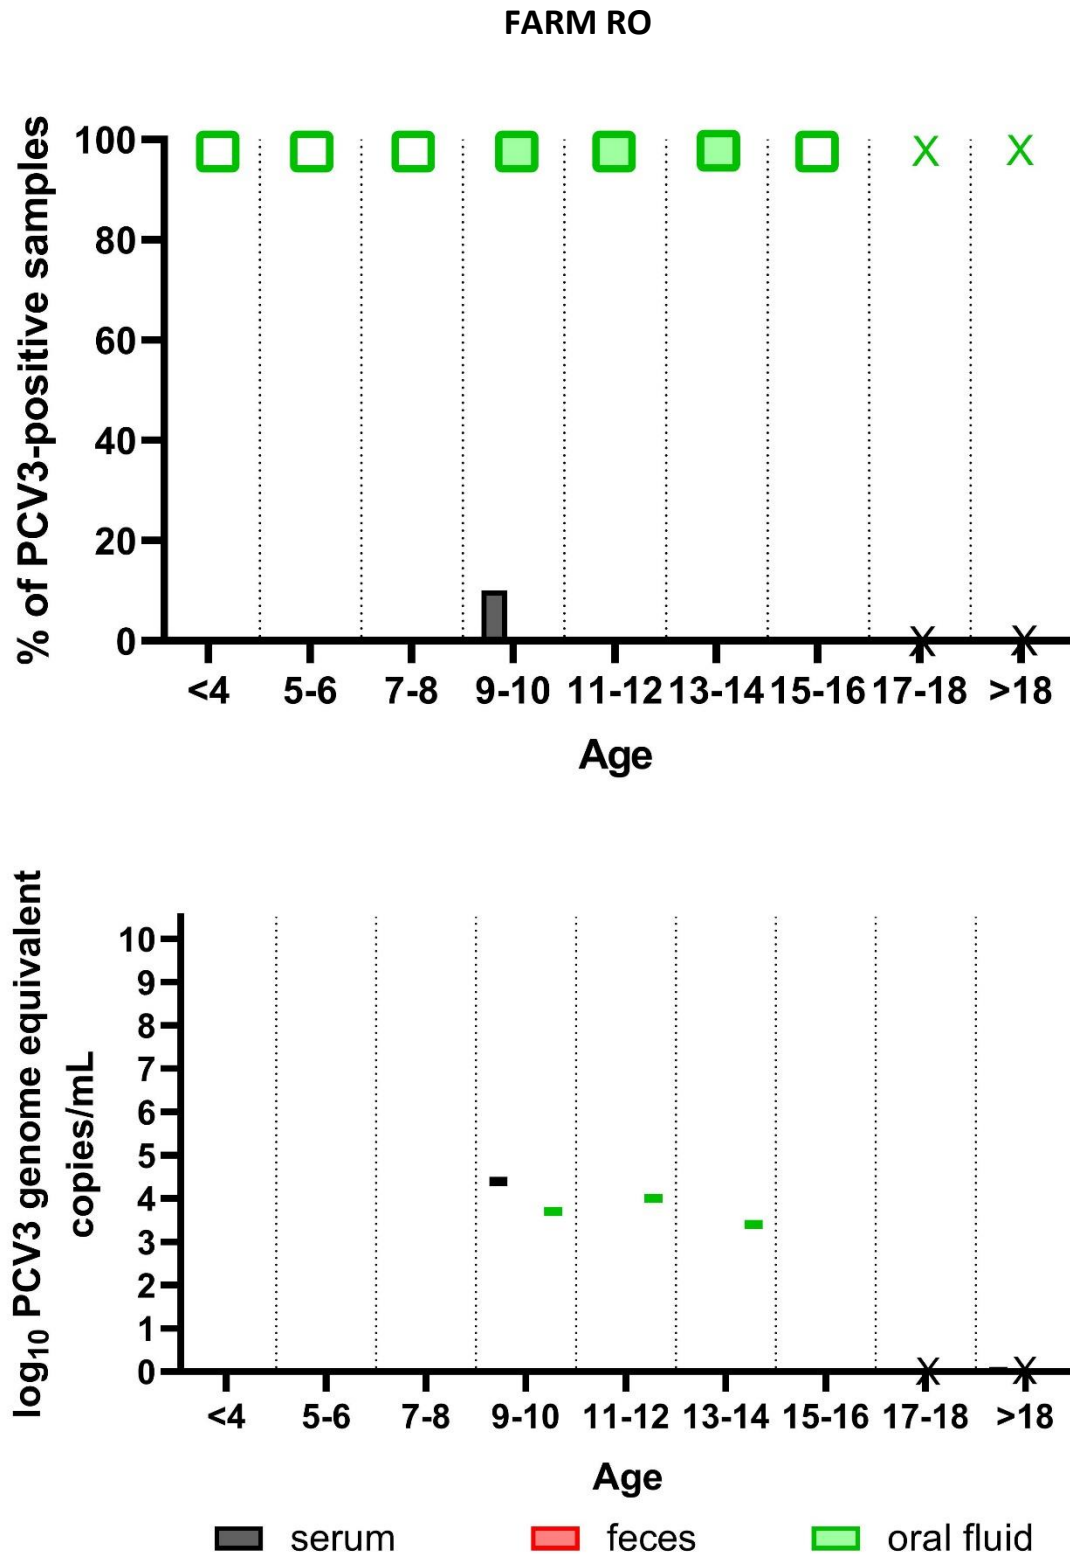

**Figure S1:** Percentages of porcine circovirus type 3 (PCV3)-positive samples and PCV3 viral loads ( $\log_{10}$  genome equivalent copies/mL) in different age groups in examined farms. Age groups with at least one oral fluid PCV3-positive are marked with a solid green square. An empty green square indicates that oral fluids reacted negative for PCV3. The whisker plot shows minimum and maximum. "X" on axis X indicates age group, which was not sampled. A green mark "X" indicates a group, where oral fluid was not obtained. Age is expressed in weeks.

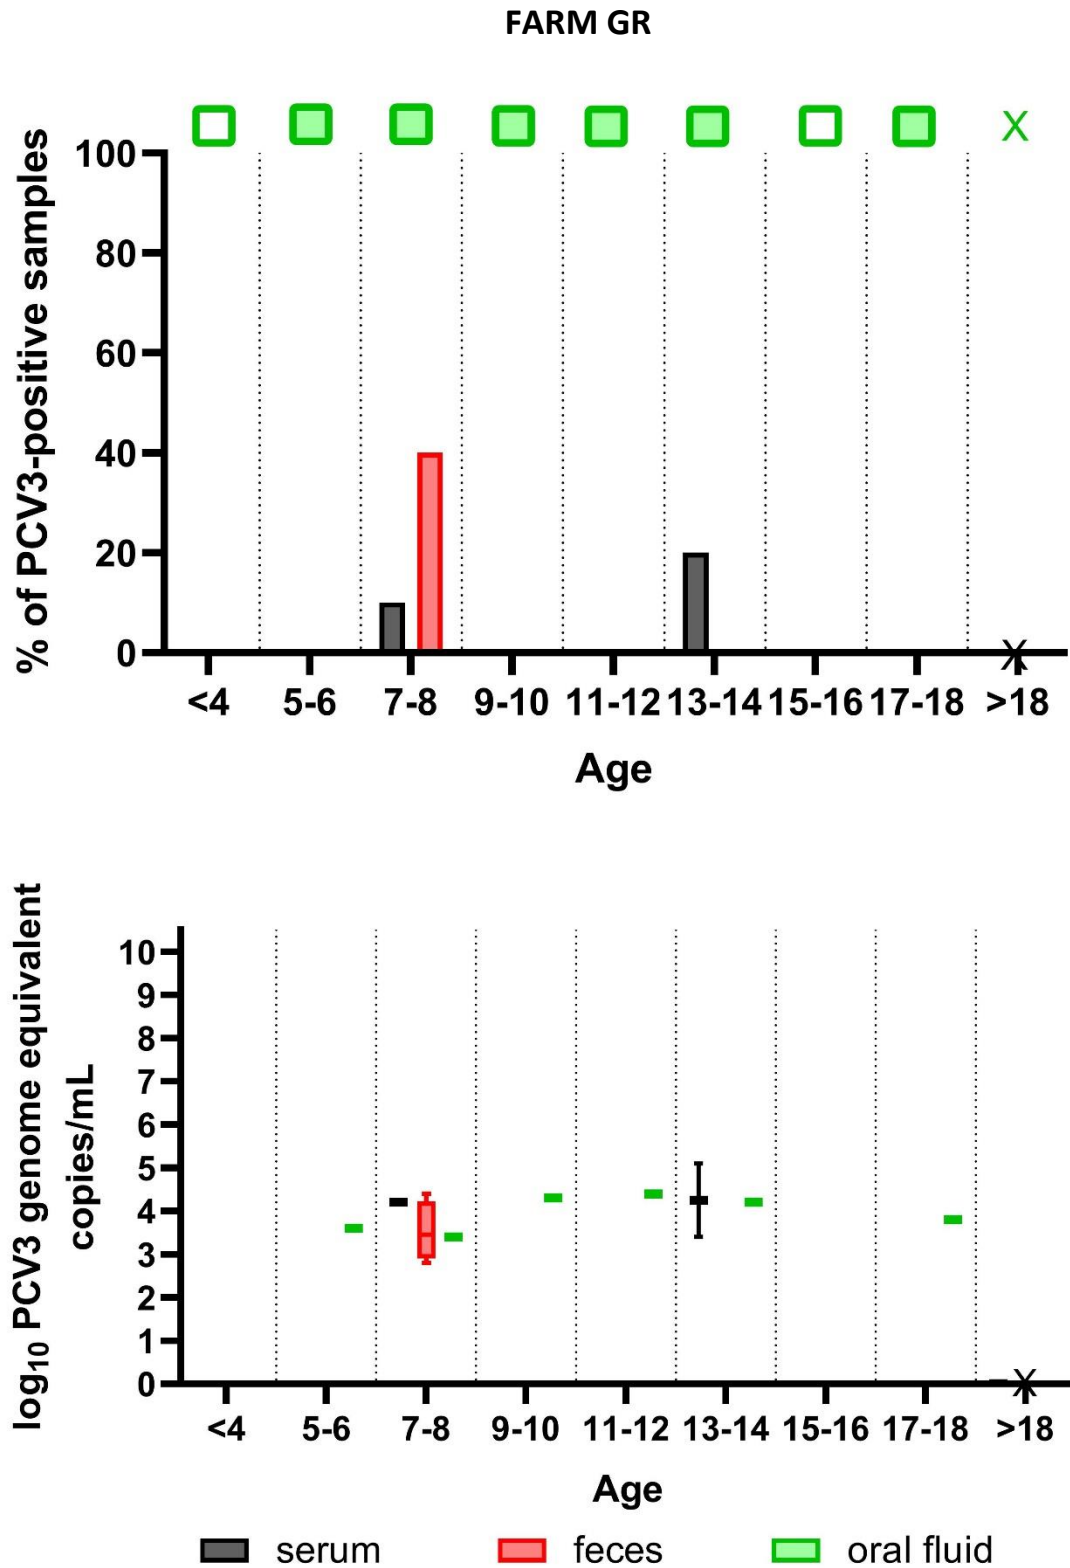

**Figure S1:** Percentages of porcine circovirus type 3 (PCV3)-positive samples and PCV3 viral loads (log<sub>10</sub> genome equivalent copies/mL) in different age groups in examined farms. Age groups with at least one oral fluid PCV3-positive are marked with a solid green square. An empty green square indicates that oral fluids reacted negative for PCV3. The whisker plot shows minimum and maximum. "X" on axis X indicates age group, which was not sampled. A green mark "X" indicates a group, where oral fluid was not obtained. Age is expressed in weeks.
