# Supplementary material for: Wide Range of the Prevalence and Viral Loads of Porcine Circovirus Type 3 (PCV3) in Different Clinical Materials from 21 Polish Pig Farms
Source: MDPI journal article supplement (doi:10.3390/pathogens9050411), 2020-05-25
Supplement: s1 [file s1]

| Farm ID | Stillborn piglet or aborted fetus ID | Sample ID | Fetal samples                                 |                     |           |
|---------|--------------------------------------|-----------|-----------------------------------------------|---------------------|-----------|
|         |                                      |           | PCV3 viral load [1]                           | PCV2 viral load [2] | PRRSV [3] |
|         |                                      |           | log <sub>10</sub> genome equivalent copies/mL |                     |           |
| KS      | FM 1                                 | 1         | -                                             | 3.9                 | -         |
|         |                                      | 2         | -                                             | 4.6                 | -         |
|         | FM 2                                 | 1         | -                                             | -                   | -         |
|         |                                      | 2         | -                                             | -                   | -         |
|         | FM 3                                 | 1         | -                                             | -                   | -         |
|         |                                      | 2         | -                                             | -                   | -         |
|         | FM 4                                 | 1         | -                                             | -                   | -         |
|         |                                      | 2         | -                                             | -                   | -         |
|         | FM 5                                 | 1         | -                                             | -                   | -         |
|         |                                      | 2         | -                                             | -                   | -         |
|         | FM 6                                 | 1         | -                                             | 5.5                 | -         |
|         |                                      | 2         | -                                             | -                   | -         |
|         | FM 7                                 | 1         | -                                             | -                   | -         |
|         |                                      | 2         | -                                             | 4.3                 | -         |
|         | FM 8                                 | 1         | 3.6                                           | -                   | -         |
|         |                                      | 2         | -                                             | 3.8                 | -         |
|         | FM 9                                 | 1         | -                                             | 5.2                 | -         |
|         |                                      | 2         | -                                             | 4.9                 | -         |
|         | FM 10                                | 1         | -                                             | -                   | -         |
|         |                                      | 2         | 3.8                                           | -                   | -         |
|         | FM 11                                | 1         | -                                             | -                   | -         |
|         |                                      | 2         | -                                             | -                   | -         |
|         | FM 12                                | 1         | -                                             | -                   | -         |
|         |                                      | 2         | -                                             | -                   | -         |
|         | FM 13                                | 1         | 3.5                                           | -                   | -         |
|         |                                      | 2         | -                                             | -                   | -         |
| PR      | FM 1                                 | 1         | 4.6                                           | -                   | -         |
|         |                                      | 2         | 5.0                                           | -                   | -         |
|         | FM 2                                 | 1         | 9.7                                           | 4.0                 | -         |
|         |                                      | 2         | 10.4                                          | -                   | -         |
|         |                                      | 3         | 9.5                                           | -                   | -         |
|         | FM 3                                 | 1         | 6.5                                           | -                   | -         |
|         |                                      | 2         | 5.4                                           | -                   | -         |
|         | FM 4                                 | 1         | 6.7                                           | -                   | -         |
|         |                                      | 2         | 6.3                                           | -                   | -         |
| PA      | FM 1                                 | 1         | -                                             | -                   | -         |
|         |                                      | 2         | -                                             | -                   | -         |
|         |                                      | 3         | 3.6                                           | -                   | -         |
|         | FM 2                                 | 1         | -                                             | -                   | -         |
|         |                                      | 2         | -                                             | -                   | -         |
|         |                                      | 3         | -                                             | -                   | -         |
| ZA      | FM 1                                 | 1         | -                                             | -                   | -         |
|         |                                      | 2         | -                                             | -                   | -         |
|         |                                      | 3         | -                                             | -                   | -         |
|         |                                      | 4         | -                                             | -                   | -         |
|         | FM 2                                 | 1         | -                                             | -                   | -         |
|         |                                      | 2         | -                                             | -                   | -         |
|         |                                      | 3         | -                                             | -                   | -         |
|         |                                      | 4         | -                                             | -                   | -         |
|         | FM 3                                 | 1         | -                                             | -                   | -         |
|         |                                      | 2         | -                                             | -                   | -         |
|         |                                      | 3         | -                                             | -                   | -         |
|         |                                      | 4         | -                                             | -                   | -         |
|         | FM 4                                 | 1         | -                                             | -                   | -         |
|         |                                      | 2         | -                                             | -                   | -         |
|         |                                      | 3         | -                                             | -                   | -         |
|         |                                      | 4         | -                                             | -                   | -         |
|         | FM 5                                 | 1         | -                                             | -                   | -         |
|         | FM 6                                 | 1         | -                                             | -                   | -         |
|         |                                      | 2         | 3.1                                           | -                   | -         |
|         |                                      | 3         | -                                             | -                   | -         |

**Table S1.** Summary results of real-time PCR for porcine circovirus type 3 (PCV3), porcine circovirus type 2 (PCV2) and porcine reproductive and respiratory syndrome virus (PRRSV) in samples collected from stillborn or aborted fetuses (fetal material - FM). “-” indicates result with Ct>37. From each stillborn piglet or aborted fetus 1-4 pooled samples were prepared consisting of different internal organs (heart, lungs, kidney, liver, spleen), body cavity fluid or umbilical cords.

These samples were tested using real-time PCR assays described in the following articles:

1. Wozniak, A.; Milek, D.; Baska, P.; Stadejek, T. Does porcine circovirus type 3 (PCV3) interfere with porcine circovirus type 2 (PCV2) vaccine efficacy? *Transbound. Emerg. Dis.* **2019**, *66*, 1454–1461
2. Wozniak, A.; Milek, D.; Matyba, P.; Stadejek, T. Real-time PCR detection patterns of porcine circovirus type 2 (PCV2) in Polish Farms with different Status of vaccination against PCV2. *Viruses* **2019**, *11*(12), 1135
3. Stadejek, T.; Larsen, L.E.; Podgorska, K.; Botner, A.; Botti, S.; Dolka, I.; Fabisiak, M.; Heegaard, P.M.H.; Hjulsgaard, Ch.K.; Huc, T.; Kvisgaard, L.K.; Sapierzynski, R.; Nielsen, J. Pathogenicity of three genetically diverse strains of PRRSV Type 1 in specific pathogen free pigs. *Vet. Microbiol.* **2017**, *209*, 13-19
